# Supplementary material
Source: publisher figshare collection journal article supplement (https://gsapubs.figshare.com/ndownloader/files/22778762)
Supplement: Supplementary file 1 [file 22778762]

## Sheet: Table S1_Super-eruption summary
Table S1. Summary of three super-eruption deposits from the Twin Falls eruptive centrre, including type localities and distinguishing characterisitics. Previous local names provided to allow reference to previous publications; and where units and sample locations of the present study could be confidently traced to previous literature.
Super Eruption Deposit (newly correlated)	Type locality	Latitude/Longtitude	Mineral phases*	Distinguishing characteristics	Previous local names	Location	Latitude/Longtitude	References
Castleford Crossing Ignimbritea	Castleford Crossing	42.545000° -114.953889°	plag, pig, aug, mt, ap, zr	hydrothermally altered basal ashfall at Castleford Crossing; >1.3 km thick in Kimberly borehole; highest-MgO pyroxenes of all Twin Falls eruption-units; distinct paleomagnetic TRM direction and normal polarity	Castleford Crossing ignimbrite	Castleford Crossing, near Twin Falls, Idaho	42.545000° -114.953889°	Bonnichsen et al. (1989)
					Tuff of City of Rocks ('Tcort')	Gwin Springs in Thorn Creek canyon, east of Idaho Highway 46. Here it overlies the former 'tuff of Gwin Springs'	43.142778° -114.655833°	Smith, (1966) Honjo et al. (1986) Oakley and Link, (2006)
					Unit 6', Salt Lake Formation	N. Cotterel Mountains	42.470000° -113.466667°	Konstantinou et al. (2012)
Grey's Landing Ignimbrite	Grey's Landing	42.132223° -114.729166°	plag, pig, aug, mt, ap, zr	four compositonal modes of pyroxene (two equilibrium pairs); red axiolites in the basal vitrophyre; highly rheomorphic; well fused parallel-bedded basal ashfall; overlies a baked orange paleosol; distinct paleomagnetic TRM direction and normal polarity; lower Th/Nb whole rock ratios than older eruption-units	Grey's Landing Member, Rogerson Formation	Backwaters recreation area	42.341944° -114.281944°	Andrews et al. (2008) Knott et al. (2016b)
					Three Creek Ignimbrite	3 Creek Road, west of Rogerson graben	42.072500° -115.162500°	Bonnichsen (1982a) Bonnichsen et al. (2008)
					House Creek Ignimbrite	Jarbige Road, near House Creek Ranch	42.072778° -114.938056°	Bonnichsen et al. (1989)
					Lincoln Reservoir Member, Cassia Formation	Rock Creek canyon, Little Creek section	42.341944° -114.281944°	Knott et al. (2016a)
					Tuff of McMullen Creek, 'Member 5'	Cassia Mountains, Schipper section	42.341111° -114.279722°	Wright et al. (2002)
					Tuff of Goose Creek, 'Member B'	Goose Creek, S. Oakley graben	42.076944° -113.926944°	Hackett et al. (1989)
					Tuff of Gwin Springs	Gwin Springs in Thorn Creek canyon, east of Idaho Highway 46.	43.193056° -114.656111°	Smith, (1966) Oakley and Link, (2006)
					Idavada Volcanic Group middle ('Tivm')	Lake Hills	43.366667° -113.920000°	Michalek, (2009)
McMullen Creek Ignimbrite	Rock Creek canyon, Little Creek section	42.341667° -114.283056°	plag, pig, aug, mt, ap, zr	complex welding profile, with two intensely welded zones (dark) enclosing a pale central lapilli-tuff with abundant black vitric lapilli. Unit is capped by an orange ash and baked paleosol; distinct paleomagnetic TRM direction and normal polarity. Single equilibrium pair of pyroxenes, similar to one of two pairs in the overlying Grey's Landing Ignimbrite.	Tuff of McMullen Creek, 'Member 4'	Cassia Mountains, Schipper section	42.341111° -114.279722°	Wright et al. (2002)
					Tuff of Goose Creek, 'Member A'	Goose Creek, S. Oakley valley	42.076944° -113.926944°	Hackett et al. (1989)
					Idavada Volcanic Group oldest ('Tivo')	Lake Hills	43.367500° -113.923333°	Michalek, (2009)
adata from Knott et al. (2016), for comparison
*Mineral abbreviations: plag - plagioclase; pig - pigeonite; aug - augite; mt - magnetite; ap - apatite; zr - zircon

## Sheet: Table S2_Whole-rock data
Table S2: New and published XRF whole-rock major and trace element data for the three super-eruption deposits of the ca. 9.0 - 8.2 Ma Twin Falls eruptive centre. Major element data are reclaculated volatile free.
Super-eruption		Castleford Crossing								Grey's Landing																																		McMullen Creek
Sample ID		AB-14-001a	A2·2102-2106a	A2·6400-6411a	MBH-12.2-013a	MBH-11.1-007a	CF-14-001a	CF-14-002a		RG-09-001Ab	RG-09-001B	RG-10.2-001b	BU-11.1-001b	GL-12.2-002b	GL-12.2-004b	GL-12.2-001b	GL-12.2-003b	3C-10.2-002	12-3C-008	12-3C-009	3C-10.2-001	MCM3-12.1-001a	RC-10.1-007a	UTC-12.2-001a	DG-11.1-002a	RC-10.1-008a	RC-11.1-003a	MCM3-12.1-002a	TC-12.1-012a	GC-12.2-005a	GC-12.2-009a	ERC-12.1-004a	OH-12.1-003	OH-12.1-002	SRP-13.2-010	MBH-11.1-001	12-MB-012	12-MB-027	SRP-13.2-030	LFC-11.1-005	LFC-11.1-002	LFC-12.2-007		BCW-12.2-005a	HG-11.2-001a	RC-10.1-009a	IS-11.1-001a	DG-11.1-001a	CW-11.2-001a
Rock Type		upper vitrophyre	upper vitrophyre	lower lithoidal	basal vitrophyre	basal vitrophyre	basal vitrophyre	basal vitrophyre		upper lithoidal	upper lithoidal	lithoidal	vitrophyre	upper lithoidal	upper lithoidal	basal vitrophyre	basal vitrophyre	upper lithoidal	lower lithoidal	lower lithoidal	basal vitrophyre	upper vitrophyre	upper vitrophyre	upper lithoidal	vitrophyre	basal vitrophyre	basal vitrophyre	basal vitrophyre	basal vitrophyre	basal vitrophyre	basal vitrophyre	basal vitrophyre	upper lithoidal	basal vitrophyre	basal vitrophyre	basal vitrophyre	lithoidal	lithoidal	basal vitrophyre	lithoidal	basal vitrophyre	lithoidal		upper vitrophyre	upper vitrophyre	upper lithoidal	basal vitrophyre	basal vitrophyre	basal vitrophyre
Longitude*		42.470000°	42.548611°	42.548611°	43.142778°	43.145000°	42.545000°	42.545000°		42.078333°	42.078333°	42.078333°	42.087222°	42.061389°	42.132778°	42.061111°	42.134166°	42.072500°	42.072500°	42.072500°	42.072500°	42.342778°	42.343333°	42.179444°	42.416667°	42.341944°	42.342222°	42.342222°	42.178889°	42.076944°	42.028333°	42.375000°	42.282222°	42.282222°	43.366667°	43.193055°	43.193055°	43.193055°	43.193055°	43.193055°	43.366667°	43.366667°		42.283055°	42.323611°	42.323611°	42.398333°	42.415277°	42.352222°
Latitude*		-113.466667	-114.371111	-114.371112	-114.655833	-114.659444	-114.953889°	-114.953889°		-114.661944°	-114.661944°	-114.661944°	-114.653333°	-114.742222°	-114.728611°	-114.742500°	-114.729722°	-115.162500°	-115.162500°	-115.162500°	-115.162500°	-114.283611°	-114.282222°	-113.976389°	-114.321667°	-114.281944°	-114.283055°	-114.283055°	-113.963889°	-113.926944°	-113.978055°	-114.177222°	-113.838611°	-113.839167°	-113.920000°	-114.656111°	-114.656111°	-114.656111°	-114.656111°	-113.656111°	-113.920000°	-113.920000°		-114.022778°	-114.485555°	-114.485555°	-114.343333°	-114.321389°	-114.431389°
SiO2 (wt.%)		69.8984	68.0388	68.2123	69.7325	70.2721	70.0685	69.8574		73.7989	74.5937	76.0272	73.8475	74.5173	72.3327	73.8083	73.9255	73.6543	73.8962	73.5593	74.0184	72.5012	72.3363	-	72.807	73.297	73.7162	73.434	72.7008	72.1244	73.7382	-	69.8203	72.7511	73.8557	71.9285	74.3977	71.7802	72.2549	74.6955	73.7111	73.8557		73.9794	74.5871	74.3189	72.7999	73.1127	72.7176
TiO2		0.713022	0.796736	0.807123	0.767191	0.738997	0.726568	0.754172		0.439549	0.426105	0.265367	0.452729	0.410479	0.478559	0.445905	0.426342	0.445251	0.442397	0.436179	0.43524	0.507015	0.499513	-	0.481049	0.441837	0.451249	0.446574	0.491933	0.392112	0.451365	-	0.502995	0.483245	0.407205	0.534797	0.474141	0.537244	0.51466	0.435587	0.401253	0.407205		0.487986	0.458713	0.462867	0.481248	0.55238	0.559311
Al2O3		13.3367	13.4069	13.4079	13.634	13.5399	13.5429	13.4601		12.4207	12.203	12.1154	12.1779	12.0604	12.0539	12.2061	12.3074	12.3176	12.1949	12.1975	12.3272	12.689	12.7539	-	12.6484	12.5636	12.3749	12.3423	12.4244	11.8164	12.2361	-	11.9607	12.4392	12.2005	12.6079	12.8487	12.8592	12.705	12.2061	12.0518	12.2005		12.1757	12.223	12.357	12.5133	12.5341	12.5859
Fe2O3		4.58046	4.8706	4.85355	4.2557	4.22513	4.35396	4.53635		3.67634	3.56003	1.78	3.6525	3.35343	3.86248	3.63665	3.44879	3.65295	3.6521	3.52982	3.36086	4.14166	4.09928	-	3.93063	3.66523	3.61964	3.67643	3.90996	3.19121	3.71417	-	3.9819	3.93243	3.35726	4.25612	3.68983	4.33451	4.1102	3.38169	3.2982	3.35726		3.45023	3.21063	3.30653	4.14376	3.79971	3.9447
MnO		0.0885832	0.0953567	0.0789665	0.0657734	0.0657195	0.0724724	0.0724396		0.0628091	0.0504425	0.06	0.0640592	0.0650103	0.0740305	0.0681846	0.0639776	0.0542841	0.0758683	0.0304067	0.056049	0.0735722	0.0750371	-	0.0688071	0.067887	0.0598592	0.151783	0.0671032	0.0587313	0.0586391	-	0.0774999	0.072055	0.058351	0.0821923	0.0320583	0.0788888	0.0698009	0.0397551	0.0574437	0.058351		0.0595826	0.0541213	0.0465755	0.0696883	0.0625209	0.0668449
MgO		0.757327	0.915338	0.869182	0.764584	0.733621	0.794971	0.795697		0.226413	0.143665	0.213871	0.207942	0.242977	0.270045	0.214638	0.255224	0.170258	0.210509	0.167106	0.163475	0.285962	0.238939	-	0.285994	0.201324	0.24366	0.251263	0.313336	0.170903	0.23402	-	0.395579	0.315581	0.290339	0.401237	0.19035	0.410774	0.354225	0.199427	0.271667	0.290339		0.277612	0.213608	0.170851	0.289555	0.347975	0.369025
CaO		2.38891	2.75326	2.46194	2.32766	2.26049	2.29934	2.35603		1.21788	0.940748	0.419636	1.22098	1.10032	1.93941	1.24934	1.22401	1.19528	1.19593	1.08198	1.16439	1.59741	1.82052	-	1.54169	1.30725	1.24784	1.22053	1.56906	1.13395	1.18746	-	4.06828	1.66089	1.57251	2.00553	0.70864	1.87682	1.8509	0.827752	1.78824	1.57251		1.23207	1.09192	1.11111	1.47657	1.57682	1.67831
Na2O		3.37991	4.38867	4.21204	3.00972	3.14031	2.99695	3.21458		2.90056	3.27316	3.11162	3.05678	3.26968	3.59311	3.07558	2.94024	2.85996	3.3366	3.59966	2.59805	2.71782	2.7506	-	3.02511	3.01784	2.98687	3.01008	2.89819	2.50315	2.72643	-	3.88777	3.01877	2.68656	2.8397	2.69728	2.97293	2.7315	3.16982	2.43448	2.68656		2.94291	2.67716	3.16451	2.91773	2.94991	2.78486
K2O		4.67327	4.61774	4.98426	5.27278	4.85597	4.98241	4.76539		5.20091	4.72133	5.99461	5.23942	4.89204	5.28166	5.23018	5.34862	5.57758	4.87778	5.31566	5.81181	5.40194	5.3106	-	5.13072	5.34663	5.22832	5.40316	5.55284	6.1611	5.58844	-	5.21304	5.24838	5.50742	5.24686	4.90096	5.03997	5.31921	4.96674	5.92272	5.50742		5.32959	5.41731	4.98901	5.21027	4.96631	5.18918
P2O5		0.174304	0.171821	0.172243	0.17015	0.167712	0.161866	0.187853		0.0579179	0.0785611	0.00952305	0.072105	0.0770304	0.109659	0.063195	0.0556323	0.0630482	0.106433	0.0731252	0.0509586	0.0844459	0.0833195	-	0.0748723	0.0673975	0.0657959	0.0638791	0.0723526	0.0485327	0.0652439	-	0.0919161	0.0784157	0.0641812	0.0894964	0.0572205	0.109454	0.0821109	0.0776478	0.0582839	0.0641812		0.0649938	0.0643711	0.0663586	0.0828288	0.0946495	0.0969522
LOI		1.8	2.64651	0.302448	1.59982	1.66687	2.11392	1.86113		2.51	0.45	0.56	2.28	0.67	0.84	2.57	2.51	0.973816	0.63799	1.06616	1.86546	1.88735	2.03076	-	2.33965	2.29242	2.16022	2.24819	2.46251	2.42009	2.20533	-	2.34473	2.19264	1.75494	1.7674	1.56601	2.01553	1.77394	0.719233	2.3094	1.75494		1.89218	1.92387	1.17596	2.02	2.31855	2.40487
ASI Index*		0.903987	0.787806	0.807999	0.928322	0.944788	0.946406	0.927972		0.989995	1.00756	0.980264	0.948914	0.958509	0.802379	0.944985	0.962625	0.953695	0.942168	0.894045	0.972013	0.967046	0.94589	-	0.955065	0.962873	0.969598	0.953591	0.917307	0.923842	0.963963	-	0.615407	0.910152	0.926863	0.900727	1.1648	0.934625	0.933051	1.0091	0.881795	0.921466		0.947482	1.00384	0.984867	0.960712	0.965498	0.958304
Mg#$		0.27083	0.296851	0.286883	0.287544	0.280603	0.290863	0.282657		0.121535	0.0831194	0.212545	0.113391	0.139983	0.135739	0.117065	0.142547	0.094779	0.114641	0.0961257	0.0985048	0.134278	0.11578	-	0.140488	0.109839	0.131357	0.133096	0.15256	0.107387	0.123991	-	0.182452	0.152742	0.162671	0.174766	0.103853	0.175523	0.162199	0.116981	0.156142	0.162671		0.153082	0.130025	0.104002	0.135677	0.170624	0.173658
Ba (ppm)		1247.91	968.227	1046.24	1131.46	1051.42	1037.2	1066.39		1255.9	1751.6	1263.9	1189	1173.9	1253.8	1257.1	1158.1	1212.4	1306.8	1211.4	1228.8	1156.67	1344.45	1292.97	1145.58	1155.46	1133.55	1210.38	1093.54	1154.09	1185.64	1101.03	1146.7	1101.9	1339.38	1172.7	1287.8	1131.1	1129.8	1280.4	1250.6	1210.9		1162.22	1188.59	1341.13	1159.49	1137.98	1127.97
Ce		156.004	137.806	132.976	142.914	139.614	141.623	147.894		172.4	172.1	174.3	168.6	169.3	164.3	170.1	164.4	172.5	166.8	160	177.2	165.055	170.495	164.921	165.771	173.423	165.958	165.664	162.119	168.162	162.124	157.88	153.1	163	167.013	171.8	139.6	164	164.4	167.8	165	165.3		160.058	170.27	194.342	163.737	162.328	161.893
La		84.2517	68.718	68.126	74.2913	70.5299	72.7395	72.8064		86.7	92.6	96.3	85	84.4	83.5	88.4	88	89	90.7	103.6	86.9	85.4068	87.9985	85.42	83.9439	84.4507	86.5171	81.6796	82.4845	83.189	88.6649	78.8049	75.3	80.9	85.7548	83.7	98.1	81.5	81.7	95.9	86.1	89.7		82.719	81.0677	108.89	84.5542	79.4074	79.1228
Nb		45.7459	42.0567	42.8423	42.7953	43.0611	43.1232	42.0733		55	54.2	56.3	55.3	55.1	55.2	54.4	55.3	55.8	54.3	53.3	55.2	53.0292	53.3043	54.0373	52.5847	53.8421	55.0125	53.008	52.4525	54.5997	55.1049	51.7076	52.3	52.3	55.4096	52.5	54.4	52.6	53.9	55.3	54.7	54.8		52.8451	51.9485	53.019	50.9682	50.9879	49.5379
Nd		70.0397	55.3608	55.9853	58.7729	56.5653	59.0196	60.2962		71.8	76.8	80.8	69.5	73	73	72	72.9	74.8	74.7	83.7	72.2	73.8212	74.0768	69.3425	70.1731	74.3838	74.7528	69.5637	71.3421	72.7243	73.2089	67.4344	65.9	68.8	71.6785	68.4	77.1	69.2	69.8	82	72.6	76.9		67.8462	71.4775	90.9285	70.0552	68.9394	68.8904
Pb		24.0772	23.0814	22.8813	23.3126	23.4528	23.4848	25.0192		26.9	25	26	25.6	27	28	26.1	27.4	26.5	25.1	25.4	25.9	24.5901	24.8921	25.1658	24.9616	25.931	24.6412	25.009	25.0102	26.389	27.1941	24.7512	24.9	24.9	25.8811	25.9	25.1	24.1	26.1	26.7	26.1	24.4		26.9378	25.2919	24.6858	24.3269	25.4189	24.15
Rb		153.329	156.79	154.412	160.515	161.158	157.427	157.821		166.8	167.3	173.8	169	171.9	169.7	168.8	168.5	169.6	169.3	169	173.8	159.32	161.647	167.394	161.522	166.424	166.795	162.879	161.915	176.335	170.394	158.477	158.9	158.9	167.527	159.5	173.3	166.5	168.3	175.2	171.2	174.7		171.769	173.553	170.902	173.463	166.361	158.157
Sr		130.189	122.666	124.48	128.24	126.41	121.144	125.249		74.8	91.3	79.8	76.7	82.2	74.3	88.8	75.8	85.2	92.8	84.7	78.8	105.828	118.954	96.4799	99.7523	82.7484	83.1378	80.5721	91.2994	68.753	80.783	93.9208	93.5	93.5	102.362	124.6	88.2	116.5	75.9	85.7	99.5	84.4		77.1483	74.9778	86.1015	94.1931	96.5267	100.926
Th		25.2669	24.5188	24.7271	25.0474	25.4873	26.0122	25.6184		27.9	26.5	28.3	27.4	28.7	28.5	27.4	28.1	28.1	26.5	27.2	28.1	26.1377	25.8375	27.2381	26.1391	26.8352	27.2019	26.8246	26.2668	27.9974	26.8565	25.5681	25.7	25.7	28.0018	26.1	27.7	26.4	27.5	28.1	27.6	27.9		27.5727	27.1042	28.2818	27.6742	26.5011	25.4351
V		22.6695	34.6051	34.1469	31.1918	31.6389	25.4205	24.8183		4.9	33	28.8	5.5	3.6	22.5	20.8	2.6	7	5.5	5.6	5.5	8.09416	9.21061	8.66998	7.69854	5.1095	4.66693	4.02551	2.65795	2.49844	1.98292	4.41919	25.7	5.1	2.16877	7.9	5.2	1.6	1.8	9.4	5.4	12.9		6.38523	7.95874	10.1101	7.96006	9.58219	11.6107
Y		67.0223	56.3429	55.5563	58.0638	57.9996	57.2977	57.9486		75.8	76	79.7	75.3	80.8	75.5	76.6	75.5	75.7	73.2	71.7	75	77.5981	76.7091	71.8297	74.8847	73.6344	73.8347	72.2866	72.7859	73.5884	73.6112	70.7391	72.3	72.3	75.1786	74.9	88.1	73	72.7	84.7	75.3	73.9		69.2999	65.0372	118.021	72.6258	68.8348	67.6391
Zn		55.7134	61.3117	57.0107	53.2594	55.7635	52.7872	49.3819		68.8	67.3	69.2	68.5	71	71.2	67.4	66.5	68.3	71.3	69	66.3	75.6562	71.7631	67.0609	69.675	65.4217	65.2315	66.4806	68.0446	63.7943	69.5533	67.9671	66	69.1	67.0381	75.2	61.9	65.2	67.6	67.9	66.6	65.5		59.1952	56.376	54.1729	69.1655	58.34	61.6645
Zr		590.141	601.284	604.536	560.81	597.826	604.287	583.813		670.1	661.1	684.2	686	631.8	648.7	676.5	693.2	685.3	658.7	648.3	659.9	679.418	680.791	652.456	654.954	646.246	645.45	634.93	635.551	612.283	684.039	644.239	658	658	647.565	681.3	634.2	628.9	652.3	650.9	633.7	648.1		638.369	611.874	631.015	622.683	643.4	632.338
Th/Nb		0.552331	0.582993	0.577166	0.585285	0.591887	0.603205	0.608899		0.507273	0.48893	0.502664	0.495479	0.520871	0.516304	0.503676	0.508137	0.503584	0.488029	0.510319	0.509058	0.492892	0.484717	0.50406	0.497086	0.498404	0.494467	0.506048	0.500774	0.512775	0.48737	0.494474	0.491396	0.491396	0.50536	0.497143	0.509191	0.501901	0.510204	0.508137	0.50457	0.509124		0.521765	0.52175	0.533428	0.542969	0.519753	0.513447
Th/Zr		0.042815	0.0407774	0.0409026	0.044663	0.0426333	0.043046	0.0438811		0.0416356	0.0400847	0.0413622	0.0399417	0.0454258	0.043934	0.0405026	0.0405366	0.0410039	0.0402308	0.0419559	0.0425822	0.0384707	0.0379522	0.041747	0.0399099	0.0415246	0.042144	0.0422481	0.0413292	0.0457262	0.0392616	0.0396873	0.0390578	0.0390578	0.0432417	0.0383091	0.0436771	0.0419781	0.0421585	0.043171	0.0435537	0.0430489		0.0431924	0.044297	0.0448196	0.0444434	0.0411892	0.0402239
Rb/Sr		1.17774	1.27819	1.24046	1.25168	1.27488	1.2995	1.26005		2.22995	1.83242	2.17794	2.20339	2.09124	2.28398	1.9009	2.22296	1.99061	1.82435	1.99528	2.20558	1.50546	1.3589	1.73501	1.61923	2.01121	2.00625	2.02152	1.77345	2.56476	2.10928	1.68734	1.69947	1.69947	1.63662	1.2801	1.96485	1.42918	2.21739	2.04434	1.7206	2.06991		2.22648	2.31472	1.98489	1.84156	1.72347	1.56706
La/Ba		0.0675141	0.070973	0.0651149	0.0656598	0.0670804	0.0701308	0.068274		0.0690342	0.052866	0.0761927	0.0714886	0.0718971	0.0665975	0.0703206	0.0759865	0.0734081	0.0694062	0.0855209	0.0707194	0.0738386	0.0654531	0.0660648	0.0732763	0.0730883	0.0763242	0.0674827	0.0754292	0.0720819	0.0747821	0.0715738	0.0656667	0.0734186	0.0640258	0.0713738	0.0761764	0.0720538	0.0723137	0.0748985	0.068847	0.0740771		0.0711733	0.0682051	0.0811928	0.0729234	0.0697795	0.0701462
aData from Knott et al. (2016a); bData from Knott et al. (2016b); Co-ordinates in bold indicate type localities; *ASI = Alkali Saturation Index; $Mg# = [100xMgO/(MgO+FeO)]; LOI = loss on ignition
										Table S2a: XRF major element data and recommended values for international reference material. Batch IDs indicate individual runs.													Table S2b: XRF trace element data and recommended values for international reference material. Batch IDs indicate individual runs.
										Batch ID	Reference	SiO2	TiO2	Al2O3	Fe2O3	MnO	MgO	CaO	Na2O	K2O	P2O5		Batch ID	Reference	Zn	V	Ba	La	Ce	Nd	Rb	Sr	Y	Zr	Nb	Th
											Material	(wt%)	(wt%)	(wt%)	(wt%)	(wt%)	(wt%)	(wt%)	(wt%)	(wt%)	(wt%)			Material	(ppm)	(ppm)	(ppm)	(ppm)	(ppm)	(ppm)	(ppm)	(ppm)	(ppm)	(ppm)	(ppm)	(ppm)
										AFUS401	BH-1	68.8368	0.406377	14.3766	5.7216	0.129063	2.64631	3.42984	3.6859	0.902195	0.0649679		AXRHT495	NIM-G	53.9108	0.297773	110.944	111.053	204.901	79.0113	318.439	12.5818	144.117	285.428	55.7036	51.6518
										AFUS406	BH-1	68.738	0.40619	14.4279	5.71557	0.128024	2.66719	3.47474	3.72319	0.912015	0.0698161		AXRHT504	NIM-G	53.0224	1.66676	99.8927	110.126	205.143	77.1552	318.802	13.0935	144.636	285.429	55.7503	51.4077
										AFUS407	BH-1	68.6186	0.413211	14.4795	5.72356	0.130024	2.69962	3.51071	3.75579	0.911008	0.075887		AXRHT514	NIM-G	51.6045	2.79905	103.139	110.548	207.104	77.3271	319.057	13.2771	144.196	284.149	55.6305	51.0257
										AFUS410	BH-1	68.6998	0.418712	14.2884	5.84188	0.131248	2.72483	3.5722	3.81695	0.928968	0.073501		AXRHT517	NIM-G	52.3143	0.0763159	107.045	111.586	204.684	77.0162	319.291	13.0059	143.819	284.283	55.7503	51.178
										AFUS414	BH-1	68.44	0.40535	14.4312	5.72998	0.128336	2.65285	3.50589	3.73099	0.929329	0.0661889		AXRHT523	NIM-G	54.0952	0.410407	105.099	109.23	203.95	78.185	318.41	13.0561	143.959	283.71	55.4557	51.3192
										AFUS416	BH-1	69.4555	0.410597	14.5721	5.75896	0.130157	2.70292	3.52032	3.81148	0.920519	0.0739947		AXRHT526	NIM-G	53.2904	-0.379128	103.197	110.12	201.402	75.8866	319.005	13.3341	144.139	283.994	55.5812	50.5603
										AFUS418	BH-1	69.4322	0.411825	14.5984	5.75501	0.129967	2.71249	3.51664	3.81676	0.912432	0.0729919		AXRHT529	NIM-G	54.3673	1.49826	109.257	111.681	203.854	77.3857	318.42	13.5941	143.966	284.798	55.5015	51.8749
										AFUS421	BH-1	69.4295	0.41096	14.6081	5.76373	0.129322	2.69506	3.50414	3.80734	0.920294	0.0723717		AXRHT549	NIM-G	54.3458	0.724587	105.331	108.638	204.956	77.2157	319.052	13.4054	144.065	283.677	55.4314	51.9702
										AFUS428	BH-1	68.7231	0.402848	14.4103	5.70084	0.127832	2.6596	3.44978	3.76803	0.906208	0.0746043		AXRHT552	NIM-G	53.3515	1.00068	107.278	109.66	202.868	78.8262	318.282	13.8496	143.988	283.8	55.3301	51.8686
										agreed reference value:		66.35	0.423	13.99	5.66	0.13	2.44	3.44	3.84	0.85	0.07		agreed reference value:		50	2	120	109	195	72	320	10	143	300	53	51
											Average	68.9304	0.409563	14.4658	5.74568	0.12933	2.68454	3.49825	3.76849	0.915885	0.0715915			Average	53.3669	0.899411	105.687	110.293	204.318	77.5565	318.751	13.2442	144.098	284.363	55.5705	51.4285
											StDv	0.396268	0.00486713	0.108645	0.0419467	0.00113242	0.0284379	0.0420179	0.04806	0.00951685	0.00380348			StDv	0.943657	0.968899	3.38203	1.03489	1.59201	0.972297	0.368289	0.367035	0.231467	0.694725	0.150507	0.464677
											% StDv	0.574881	1.18837	0.751047	0.730056	0.875602	1.05932	1.20111	1.27531	1.03909	5.31275			% StDv	1.76824	107.726	3.20004	0.938308	0.779185	1.25366	0.115541	2.7713	0.160631	0.244309	0.27084	0.903541
										AFUS401	WS-1	51.5554	2.5085	13.8784	13.4479	0.177087	5.32101	8.63797	2.82018	1.3206	0.295401		AXRHT495	MRG-1	215.924	550.148	51.6731	7.64353	31.2648	19.8255	8.42032	273.997	14.7144	111.641	21.2216	0.861339
										AFUS406	WS-1	51.4528	2.50434	13.8589	13.4335	0.178033	5.2908	8.67735	2.83085	1.30964	0.297477		AXRHT504	MRG-1	213.91	547.75	50.5477	8.61853	34.2986	18.469	8.54074	273.175	14.6751	112.12	21.5171	0.261547
										AFUS407	WS-1	51.5166	2.50735	13.8974	13.4425	0.178033	5.31614	8.68734	2.85733	1.32373	0.299501		AXRHT514	MRG-1	209.433	550.006	51.944	9.28502	30.5958	19.0414	9.05757	273.957	14.3455	111.738	21.5962	0.57489
										AFUS410	WS-1	51.4875	2.56549	13.7325	13.7619	0.182344	5.39372	8.89183	2.89033	1.35113	0.302171		AXRHT517	MRG-1	214.896	549.47	51.5348	6.73609	33.2093	20.4991	8.94937	274.883	14.2963	112.307	21.5022	-0.117549
										AFUS414	WS-1	51.1488	2.50243	13.8581	13.5131	0.17732	5.23331	8.74277	2.78422	1.34258	0.296877		AXRHT523	MRG-1	216.394	549.533	51.8648	8.567	34.6195	18.1838	8.73434	274.125	14.3333	111.7	21.5067	0.550093
										AFUS416	WS-1	51.9564	2.534	14.0607	13.5564	0.180829	5.35835	8.78249	2.86459	1.32503	0.303978		AXRHT526	MRG-1	216.341	548.376	54.6821	9.08594	32.7553	18.7357	8.87696	273.112	14.2604	111.827	21.3847	1.16738
										AFUS418	WS-1	51.8747	2.52454	14.0182	13.5597	0.179572	5.35771	8.77381	2.85485	1.33462	0.304966		AXRHT529	MRG-1	215.241	548.938	51.5086	9.77596	32.7252	15.0506	8.75352	274.395	14.3173	112.222	21.2191	0.533736
										AFUS421	WS-1	51.9883	2.52432	14.0434	13.5599	0.179061	5.32856	8.79699	2.86225	1.3369	0.308585		AXRHT549	MRG-1	219.638	550.178	54.1203	7.03954	27.199	15.9017	8.79817	273.992	14.2284	111.705	21.2759	0.668189
										AFUS428	WS-1	51.3121	2.4955	13.8552	13.4213	0.177981	5.29067	8.68028	2.82354	1.31919	0.306375		AXRHT552	MRG-1	218.608	534.896	49.5842	6.8209	28.9453	16.206	8.46328	273.724	14.0716	112.187	21.8029	0.327455
										agreed reference value:		50.99	2.52	13.95	13.43	0.18	5.28	8.81	3.08	1.36	0.3		agreed reference value:		191	526	61	9.8	28	19.2	8.5	266	14	108	20	0.93
											Average	51.5881	2.5185	13.9114	13.5218	0.178918	5.32114	8.7412	2.84313	1.32927	0.301703			Average	215.598	547.699	51.94	8.17472	31.7348	17.9903	8.7327	273.929	14.3603	111.939	21.4474	0.536342
											StDv	0.291904	0.0215952	0.107925	0.106912	0.00173889	0.0469473	0.0789919	0.0314739	0.0130039	0.00462255			StDv	2.91867	4.87199	1.58857	1.14298	2.47396	1.86336	0.219384	0.553916	0.206806	0.265273	0.192452	0.365652
											% StDv	0.565837	0.857465	0.775799	0.790661	0.971891	0.882278	0.903673	1.10702	0.978274	1.53215			% StDv	1.35375	0.889537	3.05847	13.9819	7.79575	10.3576	2.51221	0.202212	1.44013	0.236981	0.897322	68.1752
										AFUS401	BCS375	67.4698	0.378281	20.1189	0.119866	0.00500246	0.011153	0.804321	10.5271	0.752332	0.0192874		AXRHT495	BE-N	116.091	233.453	1109.9	82.0502	154.944	67.7008	44.8117	1373.75	29.6604	267.449	112.71	10.415
										AFUS406	BCS375	67.4728	0.378108	20.1359	0.108859	0.00600113	0.0314145	0.81347	10.5299	0.753973	0.0202365		AXRHT504	BE-N	117.91	233.564	1120.94	83.4215	149.588	64.3283	44.491	1374.94	29.9261	268.669	112.931	10.4296
										AFUS407	BCS375	67.3555	0.38212	20.0944	0.117847	0.00600113	0.0689091	0.857442	10.4504	0.766052	0.0242838		AXRHT514	BE-N	115.517	231.437	1102.09	81.7716	152.389	66.7647	44.6327	1376.34	29.789	269.827	112.903	10.3822
										AFUS410	BCS375	67.4112	0.390597	19.9207	0.114899	0.00601135	0.0650949	0.861666	10.6562	0.776827	0.0255212		AXRHT517	BE-N	115.932	234.491	1121.87	79.7182	152.78	68.5328	44.6192	1375.68	29.882	268.738	112.555	10.4146
										AFUS414	BCS375	67.0702	0.374094	20.0928	0.103932	0.00391867	0.0221955	0.85281	10.4222	0.769267	0.0175206		AXRHT523	BE-N	118.291	233.255	1112.89	79.279	152.299	65.3758	44.0809	1375	30.0797	268.136	112.8	10.4415
										AFUS416	BCS375	68.1434	0.384811	20.4061	0.111547	0.0059614	0.0514465	0.841235	10.6201	0.761673	0.0269981		AXRHT526	BE-N	119.167	231.892	1110.84	83.7355	158.208	70.1439	44.4863	1375.71	29.9258	268.117	113.282	10.3752
										AFUS418	BCS375	68.0781	0.383047	20.3764	0.111566	0.00595268	0.0514404	0.845537	10.5989	0.759538	0.0259971		AXRHT529	BE-N	117.625	233.317	1118.59	80.5583	152.58	66.489	44.362	1376.01	29.8134	268.844	112.613	10.4042
										AFUS421	BCS375	68.1519	0.38118	20.3913	0.111869	0.00596871	0.0476651	0.841865	10.6238	0.760974	0.0271394		AXRHT549	BE-N	119.766	232.837	1122.51	81.3194	149.894	65.3064	44.2435	1375.71	29.7866	267.68	113.136	10.3854
										AFUS428	BCS375	67.43	0.377364	20.2218	0.109594	0.0049166	0.0452447	0.822775	10.5289	0.7555	0.0278523		AXRHT552	BE-N	117.745	244.892	1161.76	85.3032	159.269	68.0459	44.5413	1376.71	29.5799	268.357	112.882	10.4
										agreed reference value:		67.1	0.38	19.8	0.12	0.003	0.5	0.89	10.4	0.79	0		agreed reference value:		120	235	1025	82	152	70	47	1370	30	265	100	10.4
											Average	67.6203	0.381067	20.1954	0.11222	0.00552601	0.0438404	0.837902	10.5508	0.761793	0.0238707			Average	117.56	234.349	1120.15	81.9063	153.55	66.9653	44.4743	1375.54	29.827	268.424	112.868	10.4053
											StDv	0.397331	0.00485703	0.166513	0.00481134	0.000748636	0.0190518	0.0200228	0.0803523	0.00787452	0.003845			StDv	1.46327	4.0568	17.0076	1.97079	3.35152	1.82922	0.21951	0.876539	0.149396	0.706302	0.235039	0.0222017
											% StDv	0.587591	1.27459	0.824511	4.28742	13.5475	43.4572	2.38963	0.761574	1.03368	16.1076			% StDv	1.2447	1.73109	1.51832	2.40615	2.18269	2.7316	0.493567	0.0637233	0.500876	0.263129	0.208243	0.213369
										AFUS401	MRG-1	39.5738	3.87111	8.50744	18.0608	0.173085	13.6888	14.873	0.722106	0.197135	0.0588772		AXRHT495	JR-3	193.916	0.549666	52.4632	156.651	309.061	103.894	472.472	9.68756	174.289	1670.92	572.159	113.627
										AFUS406	MRG-1	39.6955	3.84928	8.55996	17.9866	0.171032	13.5771	14.8413	0.769086	0.218441	0.0607096		AXRHT504	JR-3	192.917	0.694461	54.8426	157.776	308.497	106.049	471.406	10.3389	173.912	1673	572.801	113.633
										AFUS407	MRG-1	39.7086	3.86532	8.54477	18.0426	0.171032	13.5822	14.8823	0.786403	0.212401	0.0596978		AXRHT514	JR-3	189.936	1.60623	58.2052	157.52	309.381	104.087	471.562	10.9715	174.1	1673.3	573.081	113.582
										AFUS410	MRG-1	39.639	3.95216	8.4352	18.4978	0.176333	13.8469	15.2378	0.784459	0.21058	0.0622717		AXRHT517	JR-3	190.708	0.792617	53.1903	158.221	310.581	105.15	471.367	10.8081	174.305	1672.55	573.11	113.681
										AFUS414	MRG-1	39.3066	3.84545	8.4733	18.1606	0.173401	13.518	15.0393	0.720473	0.205655	0.0545085		AXRHT523	JR-3	194.275	1.97801	52.987	157.563	309.123	104.902	471.485	10.4691	174.478	1671.91	572.984	113.661
										AFUS416	MRG-1	39.9755	3.90662	8.63735	18.2305	0.173874	13.7728	15.1096	0.777447	0.203244	0.0629955		AXRHT526	JR-3	194.309	1.95694	49.4652	155.52	310.451	104.06	471.758	10.5951	174.165	1671.97	572.822	113.941
										AFUS418	MRG-1	39.9056	3.90192	8.60418	18.2227	0.17362	13.7524	15.1089	0.779682	0.204188	0.0639929		AXRHT529	JR-3	194.109	0.525707	51.7846	157.767	309.242	103.189	472.009	10.959	174.535	1672.62	572.946	113.619
										AFUS421	MRG-1	39.9885	3.89419	8.60039	18.2238	0.173093	13.7802	15.1011	0.777254	0.202861	0.0643304		AXRHT549	JR-3	191.103	0.434693	53.7027	157.636	309.715	103.87	471.194	10.8374	174.366	1671.71	572.912	113.426
										AFUS428	MRG-1	39.4734	3.84911	8.50605	18.0223	0.174048	13.5901	14.9402	0.749447	0.200618	0.064657		AXRHT552	JR-3	193.453	1.76209	49.7736	157.983	316.363	106.081	471.813	11.0239	174.43	1671.88	572.917	113.387
										agreed reference value:		39.5931	3.81852	8.56888	18.1608	0.172188	13.7244	14.8993	0.749524	0.182317	0.0810296		agreed reference value:		209	4.2	65.8	179	327	107	453	10.4	166	1675	564	112
											Average	39.6963	3.88169	8.54096	18.1609	0.17328	13.6787	15.0148	0.762928	0.206125	0.0613379			Average	192.747	1.14449	52.9349	157.404	310.268	104.587	471.674	10.6323	174.287	1672.21	572.859	113.617
											StDv	0.231066	0.0352803	0.0664264	0.157997	0.00160355	0.115258	0.136449	0.0259806	0.00656673	0.00328672			StDv	1.70606	0.662977	2.63748	0.827815	2.38046	1.01624	0.390628	0.426434	0.198584	0.731868	0.282156	0.158919
											% StDv	0.582084	0.908891	0.77774	0.869988	0.925409	0.842606	0.908761	3.40538	3.1858	5.35839			% StDv	0.885127	57.9278	4.9825	0.525917	0.767225	0.97167	0.0828174	4.01075	0.113941	0.0437666	0.049254	0.139872
										AFUS410	BCS372/1	20.1168	0.272112	5.22096	3.48095	0.073138	1.39446	66.292	0.110458	0.758691	0.0775844
										AFUS416	BCS372/1	20.3155	0.274723	5.36198	3.43129	0.0705432	1.37916	65.6143	0.110637	0.75082	0.0779944
										AFUS418	BCS372/1	20.3006	0.273889	5.36077	3.4299	0.0714321	1.37504	65.586	0.106547	0.749674	0.0769915
										AFUS421	BCS372/1	20.3675	0.26901	5.34543	3.43428	0.0716245	1.37832	65.5813	0.105898	0.747121	0.0784026
										AFUS428	BCS372/1	20.176	0.264645	5.28838	3.39937	0.0698157	1.35537	64.7426	0.106922	0.741799	0.0775884
										agreed reference value:		20.5	0.16	3.77	4.82	0.07	2.42	64.8	0.1	0.49	0.08
											Average	20.2553	0.270876	5.3155	3.43516	0.0713107	1.37647	65.5632	0.108092	0.749621	0.0777123
											StDv	0.104589	0.00411457	0.0607822	0.0292452	0.00125265	0.0139754	0.549544	0.00227176	0.00614694	0.000526175
											% StDv	0.516356	1.51899	1.14349	0.851351	1.75661	1.01531	0.83819	2.10168	0.820006	0.677081
[truncated: 16 more columns]

## Sheet: Table S3_Cpx data
Table S3. Clinopyroxene composition data for the Castleford Crossing, Grey's Landing and McMullen Creek super-eruption deposits from the Twin Falls eruptive centre, ID (values determined by electron microprobe analysis, Open University, Milton Keynes, UK).
Castleford Crossing eruption (data from Knott et al., 2016a, for comparison)
Sample ID	CF-14-001																																							A2·2102-2106
Mineral phase	augite	augite	pigeonite	augite	augite	pigeonite	pigeonite	pigeonite	augite	pigeonite	pigeonite	augite	augite	pigeonite	augite	pigeonite	pigeonite	pigeonite	pigeonite	pigeonite	pigeonite	pigeonite	pigeonite	augite	pigeonite	pigeonite	pigeonite	augite	augite	pigeonite	pigeonite	augite	augite	pigeonite	pigeonite	augite	augite	augite	pigeonite	pigeonite	pigeonite	pigeonite	pigeonite	pigeonite	pigeonite	augite	augite	pigeonite	pigeonite
SiO2	51.1185	50.8688	50.9679	51.2521	51.1675	51.0215	50.8424	50.9884	51.1563	50.6092	50.6493	51.0965	51.2707	50.9221	51.2733	51.0872	51.0606	51.2139	51.2392	51.1587	50.7827	51.2448	51.0281	51.349	51.1473	50.7734	51.1851	51.0703	51.2154	51.138	50.8904	51.2438	51.5379	51.2733	51.12	51.3444	51.3663	50.9742	50.9839	51.3246	50.9528	50.8402	50.7384	51.0579	51.1105	51.3332	51.1141	50.3548	51.1494
TiO2	0.351466	0.435622	0.265117	0.344502	0.357297	0.24839	0.237724	0.217393	0.343668	0.245749	0.218816	0.335332	0.379733	0.252067	0.306869	0.227382	0.271727	0.271065	0.29125	0.248714	0.247339	0.253869	0.237645	0.358887	0.268206	0.215166	0.238217	0.362129	0.32815	0.237219	0.243499	0.329324	0.394988	0.228595	0.223313	0.382109	0.370364	0.395591	0.231116	0.221878	0.219	0.230935	0.22164	0.247396	0.223727	0.337629	0.353843	0.22301	0.261805
Al2O3	0.905845	0.949658	0.443846	0.91724	0.936766	0.44973	0.450704	0.458863	0.915759	0.430945	0.432702	0.880826	0.954468	0.526807	0.872003	0.42387	0.485877	0.423626	0.467556	0.418788	0.419708	0.520056	0.435082	0.916571	0.438406	0.435179	0.428599	0.930333	0.866568	0.41964	0.431677	1.00065	0.997623	0.461988	0.440378	0.945701	0.96857	0.958534	0.425654	0.346144	0.41011	0.42026	0.457796	0.435082	0.416335	0.893218	0.907513	0.441833	0.449665
Cr2O3	0	0.028656	0	0	0.035829	0	0.024606	0	0.03351	0.024539	0	0.016763	0	0	0	0.017912	0	0.026902	0.02013	0.071548	0	0	0.006708	0.007172	0	0.033476	0.029048	0.016739	0	0.102831	0.022328	0.043112	0.040619	0	0	0	0	0.031086	0	0	0.051375	0	0.093818	0	0.049148	0.021539	0	0.053613	0.006704
FeO	16.0698	16.1661	28.8681	15.5564	16.2885	28.5393	28.3912	28.7004	15.6187	29.1429	28.1703	15.4897	15.8794	28.6094	15.736	28.1674	28.5457	27.8262	28.6282	28.586	28.6894	26.4012	28.5744	15.9753	28.9705	28.7609	28.9401	15.8782	16.0778	28.7138	29.0169	15.3474	16.1721	28.6147	29.1437	15.8572	16.0934	15.865	28.8627	28.7177	28.902	28.5969	28.921	28.793	29.0478	15.6667	16.0808	28.4189	28.8714
MnO	0.583008	0.605307	0.990863	0.540848	0.546259	0.918975	0.872683	0.982977	0.552585	0.936981	0.968313	0.544376	0.566621	0.992212	0.58915	0.921811	0.958754	0.922141	0.98311	0.9667	0.967739	0.914685	0.948193	0.544118	0.896664	0.948761	0.959571	0.55715	0.629149	0.953866	0.976808	0.555111	0.571181	0.88659	0.948942	0.625745	0.560588	0.509828	1.0328	0.861034	0.852571	0.879571	0.940829	0.930672	0.88862	0.590434	0.546382	0.944336	0.989834
MgO	12.6047	12.4066	17.161	12.5411	12.4674	16.9522	17.3172	17.3524	12.621	16.9964	17.0205	12.6628	12.4489	17.0202	12.557	17.3449	17.4772	17.2506	17.3698	17.0803	17.2738	16.5571	17.3077	12.6115	17.3627	16.4026	17.3871	12.5994	12.6092	17.4343	17.3958	12.5215	12.4863	17.3323	17.4526	12.5866	12.6604	12.4168	17.4478	17.5834	17.5392	17.4448	17.5364	17.5687	17.6051	12.7341	12.6309	16.6648	17.3695
CaO	18.5943	18.0965	1.73047	18.7557	18.5017	1.66145	1.72131	1.78231	18.5999	1.76523	2.54544	18.7434	18.399	1.72027	18.3047	1.74201	1.69455	1.73882	1.71167	1.7148	1.75957	4.33525	1.71124	18.2989	1.72106	1.68918	1.75474	18.4501	18.3789	1.66279	1.70128	18.4109	18.3079	1.6986	1.70122	18.1984	18.1323	18.386	1.73856	1.7674	1.65661	1.75333	1.73658	1.72254	1.75473	18.5292	18.1857	1.70847	1.72313
Na2O	0.284091	0.315163	0.024872	0.297394	0.315161	0.025348	0	0.03547	0.277903	0.006616	0.02228	0.32318	0.31046	0.031436	0.248401	0.037888	0	0.058992	0.047589	0	0.041581	0.064212	0.023801	0.309467	0.040592	0	0.013187	0.308041	0.261883	0	0	0.286439	0.278715	0.020248	0.048723	0.287309	0.311022	0.262604	0.064906	0.017712	0.003549	0.019744	0.027902	0.047606	0.00152	0.269229	0.290062	0.013711	0
K2O	0	0	0	0.013872	0	0.006652	0.013067	0	0.004856	0.000475	0.002371	0.00578	0.002082	0.010212	0.012032	0.010219	0	0.01569	0.004988	0.000238	0.001662	0.000237	0	0	0.001187	0.005698	0.007599	0.00185	0	0.00095	0	0.028694	0.000925	0.002138	0	0	0	0.0111	0	0	0	0.003088	0	0.008313	0	0.023595	0.016659	0.025407	0
NiO	0.047589	0.011896	0	0	0.004758	0.029558	0.013008	0	0.011901	0	0.022466	0.032136	0	0	0.024992	0.01301	0	0	0	0	0.007093	0.01894	0	0	0.062653	0	0	0	0	0	0	0	0	0.030745	0	0	0	0	0	0.024833	0.016552	0	0	0	0	0.007141	0	0	0
Total	100.559	99.8842	100.452	100.219	100.621	99.853	99.8838	100.518	100.136	100.159	100.053	100.131	100.211	100.085	99.9245	99.9936	100.494	99.748	100.763	100.246	100.191	100.31	100.273	100.371	100.909	99.2643	100.943	100.174	100.367	100.663	100.679	99.7669	100.788	100.549	101.079	100.227	100.463	99.8107	100.787	100.865	100.604	100.189	100.674	100.811	101.097	100.406	100.126	98.8489	100.821
O	6	6	6	6	6	6	6	6	6	6	6	6	6	6	6	6	6	6	6	6	6	6	6	6	6	6	6	6	6	6	6	6	6	6	6	6	6	6	6	6	6	6	6	6	6	6	6	6	6
Si	1.94951	1.95226	1.96582	1.95618	1.95079	1.97551	1.96771	1.96408	1.95447	1.96184	1.9617	1.95283	1.95772	1.96896	1.96187	1.97246	1.96457	1.97844	1.96671	1.97343	1.96355	1.97031	1.96831	1.95746	1.96369	1.98073	1.9642	1.95233	1.95505	1.9657	1.96	1.9609	1.95724	1.97088	1.96088	1.95887	1.95633	1.95495	1.9607	1.96791	1.96158	1.96373	1.95467	1.96108	1.95921	1.95556	1.95487	1.97263	1.96452
Ti	0.01008	0.012573	0.00769	0.009888	0.010244	0.007232	0.006919	0.006297	0.009874	0.007164	0.006373	0.009638	0.010904	0.007329	0.00883	0.006602	0.007862	0.007875	0.008407	0.007215	0.007192	0.00734	0.006893	0.010288	0.007744	0.006312	0.006874	0.010411	0.00942	0.006857	0.007053	0.009477	0.011281	0.006608	0.006442	0.010963	0.010608	0.011409	0.006684	0.006398	0.00634	0.006708	0.006421	0.007146	0.006449	0.009672	0.010177	0.00657	0.007562
Al	0.040715	0.042955	0.020176	0.041261	0.042092	0.020523	0.020558	0.020832	0.041235	0.019688	0.019752	0.039675	0.042954	0.024007	0.039324	0.019288	0.022033	0.019287	0.021151	0.019039	0.019126	0.023566	0.019779	0.04118	0.019837	0.020008	0.019384	0.041916	0.038987	0.019011	0.019595	0.045128	0.044652	0.020929	0.019909	0.042523	0.043476	0.043326	0.019293	0.015642	0.018608	0.019132	0.020786	0.019695	0.018809	0.040104	0.040906	0.0204	0.020355
Cr	0	0.00087	0	0	0.00108	0	0.000753	0	0.001012	0.000752	0	0.000507	0	0	0	0.000547	0	0.000822	0.000611	0.002182	0	0	0.000205	0.000216	0	0.001033	0.000881	0.000506	0	0.003125	0.00068	0.001304	0.00122	0	0	0	0	0.000943	0	0	0.001564	0	0.002858	0	0.00149	0.000649	0	0.001661	0.000204
Fe2	0.512533	0.518867	0.93117	0.496558	0.519352	0.92413	0.918929	0.924573	0.499044	0.944783	0.912466	0.495086	0.507083	0.925131	0.503545	0.909508	0.918517	0.898989	0.918962	0.92219	0.927712	0.848934	0.921775	0.509302	0.930189	0.938332	0.928768	0.507635	0.513276	0.923057	0.93462	0.491147	0.513628	0.919859	0.934913	0.505944	0.512596	0.508851	0.928284	0.920859	0.930527	0.923757	0.931784	0.924878	0.931209	0.499129	0.514338	0.93106	0.927359
Mn	0.018833	0.019677	0.032371	0.017485	0.01764	0.030139	0.028608	0.032072	0.017882	0.030765	0.031767	0.017622	0.018326	0.032496	0.019094	0.030146	0.031245	0.030174	0.031962	0.031586	0.031694	0.029789	0.030979	0.017569	0.029159	0.03135	0.03119	0.018041	0.020343	0.031057	0.031866	0.017992	0.018373	0.028866	0.030832	0.020221	0.018084	0.016562	0.033643	0.027964	0.027801	0.028777	0.0307	0.030278	0.028852	0.019052	0.0177	0.031335	0.032201
Mg	0.716632	0.709831	0.986739	0.713587	0.708606	0.97851	0.99914	0.996463	0.718849	0.98221	0.982759	0.721467	0.708641	0.981092	0.716275	0.998344	1.00246	0.993471	0.993912	0.982226	0.995701	0.949042	0.995259	0.716705	0.99376	0.953928	0.994678	0.718043	0.717565	0.999062	0.9988	0.714304	0.706917	0.993202	0.99801	0.71587	0.718829	0.70992	1.00031	1.00507	1.00661	1.00451	1.00714	1.00598	1.00605	0.723195	0.720153	0.97324	0.994532
Ca	0.759787	0.744125	0.071512	0.767	0.755777	0.068925	0.071377	0.073559	0.761389	0.073316	0.10563	0.767517	0.752731	0.071267	0.750424	0.072063	0.069856	0.071971	0.070392	0.070873	0.072895	0.178593	0.070723	0.747398	0.070796	0.070604	0.072147	0.755701	0.751697	0.068482	0.070204	0.754838	0.744942	0.069956	0.069918	0.743894	0.739917	0.755505	0.071636	0.072607	0.068331	0.072561	0.07168	0.070887	0.072068	0.756302	0.745199	0.07171	0.070909
Na	0.021007	0.023452	0.00186	0.022008	0.023297	0.001903	0	0.002649	0.020586	0.000497	0.001673	0.023948	0.022985	0.002357	0.018428	0.002836	0	0.004419	0.003542	0	0.003117	0.004787	0.00178	0.022873	0.003022	0	0.000981	0.022832	0.019383	0	0	0.021252	0.020523	0.001509	0.003624	0.021253	0.022967	0.019527	0.00484	0.001317	0.000265	0.001479	0.002084	0.003545	0.000113	0.019886	0.021509	0.001041	0
K	0	0	0	0.000675	0	0.000329	0.000645	0	0.000237	2.3e-05	0.000117	0.000282	0.000101	0.000504	0.000587	0.000503	0	0.000773	0.000244	1.2e-05	8.2e-05	1.2e-05	0	0	5.8e-05	0.000284	0.000372	9e-05	0	4.7e-05	0	0.001401	4.5e-05	0.000105	0	0	0	0.000543	0	0	0	0.000152	0	0.000407	0	0.001147	0.000813	0.00127	0
Ni	0.00146	0.000367	0	0	0.000146	0.00092	0.000405	0	0.000366	0	0.0007	0.000988	0	0	0.000769	0.000404	0	0	0	0	0.000221	0.000586	0	0	0.001935	0	0	0	0	0	0	0	0	0.00095	0	0	0	0	0	0.000766	0.000512	0	0	0	0	0.000219	0	0	0
Total	4.03056	4.02498	4.01734	4.02464	4.02902	4.00812	4.01504	4.02053	4.02494	4.02104	4.02294	4.02956	4.02144	4.01314	4.01914	4.0127	4.01655	4.00622	4.0159	4.00875	4.02129	4.01296	4.0157	4.02299	4.02019	4.00258	4.01947	4.02751	4.02573	4.0164	4.02282	4.01774	4.01883	4.01286	4.02453	4.01953	4.02281	4.02154	4.02539	4.01853	4.02213	4.02081	4.02813	4.0239	4.02425	4.02491	4.02566	4.01092	4.01764
Enstatite	36.0306	35.9805	49.5993	36.0918	35.7208	49.6311	50.222	49.9582	36.3187	49.1029	49.117	36.363	35.9999	49.613	36.3546	50.4236	50.3538	50.573	50.1149	49.7257	49.8771	48.0146	50.0695	36.3182	49.8189	48.5988	49.8437	36.2396	36.1943	50.189	49.8497	36.4387	35.9665	50.0854	49.8297	36.4179	36.4639	35.9585	50.0096	50.2904	50.1932	50.2048	50.0915	50.2551	50.0691	36.5504	36.3771	49.2528	49.9063
Ferrosilite	25.769	26.3007	46.8061	25.1149	26.1805	46.8729	46.1902	46.3539	25.2134	47.2319	45.6038	24.9531	25.7605	46.7831	25.5575	45.9367	46.1373	45.7633	46.3358	46.6863	46.4714	42.9499	46.3726	25.8083	46.632	47.8042	46.541	25.6203	25.8898	46.3708	46.6465	25.0548	26.1324	46.3868	46.6793	25.7385	26.0024	25.7741	46.409	46.0766	46.3995	46.1686	46.3434	46.2036	46.3442	25.226	25.9807	47.1182	46.5355
Wollastonite	38.2004	37.7188	3.59461	38.7933	38.0987	3.49595	3.58778	3.68792	38.4679	3.66523	5.27924	38.684	38.2397	3.60391	38.0879	3.6397	3.50888	3.66371	3.5493	3.58798	3.65149	9.03551	3.55793	37.8735	3.54913	3.59699	3.61532	38.1402	37.9159	3.44027	3.50385	38.5065	37.9011	3.52776	3.49094	37.8436	37.5337	38.2674	3.5814	3.63301	3.40724	3.62654	3.56509	3.54126	3.58667	38.2236	37.6422	3.62903	3.55826
total	100	100	100	100	100	100	100	100	100	100	100	100	100	100	100	100	100	100	100	100	100	100	100	100	100	100	100	100	100	100	100	100	100	100	100	100	100	100	100	100	100	100	100	100	100	100	100	100	100
Mg#	58.3023	57.771	51.4487	58.9671	57.706	51.4291	52.0909	51.8711	59.024	50.9711	51.8545	59.3042	58.2896	51.4679	58.7197	52.3282	52.1849	52.4963	51.9591	51.5762	51.7674	52.7839	51.9166	58.4585	51.6521	50.4121	51.7133	58.5833	58.2988	51.9771	51.6598	59.2562	57.9181	51.9169	51.6322	58.5908	58.3738	58.2488	51.8672	52.1863	51.9638	52.094	51.9433	52.1001	51.9317	59.1656	58.336	51.1075	51.7476
Grey's Landing eruption
Sample ID	RC-10.1-008
Mineral phase	pigeonite	pigeonite	pigeonite	pigeonite	pigeonite	pigeonite	pigeonite	pigeonite	pigeonite	pigeonite	pigeonite	pigeonite	pigeonite	pigeonite	pigeonite	pigeonite	pigeonite	pigeonite	pigeonite	pigeonite	pigeonite	pigeonite	pigeonite	pigeonite	pigeonite	pigeonite	pigeonite	pigeonite	pigeonite	pigeonite	pigeonite	pigeonite	pigeonite	pigeonite	pigeonite	pigeonite	pigeonite	pigeonite	pigeonite	augite	augite	augite	augite	augite	augite	augite	augite	augite	augite
SiO2	49.1253	49.4562	49.0734	49.2111	49.1311	49.3921	49.3188	49.1658	49.2226	48.9416	48.651	48.407	49.1754	49.1893	48.9325	49.3454	49.0509	48.9729	47.8139	47.4349	49.2805	49.1237	49.222	49.1727	49.3425	49.7929	48.9158	49.7247	49.6863	49.5286	49.8425	50.0405	50.4537	49.5345	49.6657	49.8911	49.577	49.7431	44.7811	49.7576	50.0374	50.166	48.4254	49.8802	50.0754	50.2525	49.1274	49.7107	49.0896
TiO2	0.22175	0.26666	0.28001	0.26256	0.17573	0.27843	0.3224	0.22519	0.24046	0.22141	0.30303	0.27069	0.27831	0.17333	0.21989	0.25036	0.24068	0.24725	0.2313	0.24353	0.30386	0.27565	0.24125	0.19754	0.24675	0.2302	0.28617	0.28956	0.21179	0.21969	0.2546	0.2215	0.2562	0.18248	0.2707	0.26291	0.25096	0.28884	0.29477	0.23651	0.32168	0.29634	0.65832	0.34748	0.31996	0.39785	0.40832	0.39909	0.39201
Al2O3	0.38862	0.39161	0.38624	0.43283	0.38302	0.37987	0.40258	0.60493	0.40263	0.39146	0.48733	0.39992	0.42374	0.3916	0.42723	0.37472	0.70583	0.42843	0.47059	0.54478	0.47779	0.46721	0.40655	0.44205	0.43554	0.49201	0.48417	0.51838	0.52502	0.51643	0.5226	0.52675	0.50911	0.47757	0.53528	0.51602	0.544	0.50188	0.43646	0.82251	0.74558	0.79006	1.28076	0.84051	0.78431	0.78218	0.98293	0.95723	0.80964
Cr2O3	1e-05	0.00421	1e-05	1e-05	0.00388	0.01803	1e-05	0.01308	1e-05	0.00791	0.01127	0.00363	0.01679	0.00107	0.00783	1e-05	0.01598	1e-05	0.01419	1e-05	0.0057	1e-05	0.00447	1e-05	1e-05	1e-05	0.01501	1e-05	0.03211	1e-05	1e-05	1e-05	0.00544	0.00635	1e-05	0.01292	1e-05	1e-05	1e-05	0.0105	0.00933	0.01398	0.01586	1e-05	0.00223	1e-05	1e-05	0.01288	0.00376
FeO	35.952	35.8711	35.4147	35.6064	35.8452	35.3921	35.3332	34.8562	35.7416	35.4075	34.6284	35.0599	35.5583	35.3808	35.7093	35.3709	33.4638	35.699	35.1408	34.0209	34.9158	34.8642	35.483	35.6163	35.1217	33.3076	33.2096	33.3379	33.5151	33.3853	33.3991	33.5833	33.6453	33.7833	33.6041	33.4887	33.2468	33.8303	34.8213	26.2851	24.0426	24.0852	23.7152	24.4578	23.5598	23.8404	23.6297	23.6735	24.1212
MnO	1.17726	1.16317	1.20002	1.18532	1.20058	1.18231	1.17372	1.17503	1.20142	1.18285	1.14475	1.1594	1.1808	1.14075	1.18383	1.21651	1.1432	1.1365	1.18002	1.12241	1.15866	1.15075	1.18638	1.19173	1.19795	1.05747	1.11712	1.088	1.10112	1.1023	1.12337	1.1084	1.11191	1.11284	1.14871	1.12189	1.07902	1.09207	1.12924	0.84318	0.77371	0.77157	0.73336	0.79702	0.77753	0.76618	0.75844	0.78096	0.74336
MgO	8.89633	8.92224	8.93677	8.87583	9.06557	8.92699	8.95663	8.72904	8.90022	8.90406	8.77569	8.74385	8.97885	8.94575	8.82823	8.92794	8.63212	8.9921	8.82305	8.37321	9.11344	9.11078	8.86506	8.93478	8.98334	10.1276	10.2725	10.2436	10.1704	10.1164	10.2449	10.3613	10.282	10.156	10.1388	10.3636	10.1863	10.2237	10.6662	7.85426	7.78893	7.81999	7.53391	7.9167	7.84964	7.73149	7.65561	7.905	7.67617
CaO	4.84952	4.81637	5.00324	5.0324	4.85757	4.87103	4.94033	4.85715	4.9763	5.04308	4.91245	4.9569	5.14097	4.88067	4.86289	4.90551	6.18171	4.85566	4.85225	6.03928	5.20521	5.51472	4.91389	4.93765	4.89786	5.17527	5.19479	5.13141	5.2212	5.28295	5.07978	5.10481	5.11326	5.2269	5.18135	5.12079	5.16002	5.11325	4.58413	13.5621	16.5348	16.7588	17.0904	16.2648	16.7472	16.7948	16.3132	16.5142	16.1274
Na2O	0.0944	0.07018	0.05293	0.07617	0.03765	0.07957	0.06523	0.0755	0.07651	0.06978	0.05605	0.05973	0.06665	0.0661	0.07135	0.08033	0.1064	0.05708	0.08946	0.09428	0.09489	0.05265	0.05522	0.04616	0.06791	0.09924	0.09416	0.06236	0.07028	0.0634	0.04695	0.07862	0.0923	0.07574	0.06622	0.07256	0.06324	0.07045	0.27387	0.18997	0.20802	0.24229	0.23792	0.22582	0.20192	0.21545	0.23652	0.2268	0.23749
K2O	1e-05	1e-05	1e-05	1e-05	1e-05	1e-05	1e-05	0.00983	1e-05	1e-05	1e-05	1e-05	1e-05	1e-05	1e-05	1e-05	0.02189	1e-05	1e-05	0.00411	1e-05	1e-05	1e-05	1e-05	1e-05	1e-05	1e-05	1e-05	1e-05	1e-05	1e-05	1e-05	1e-05	1e-05	1e-05	1e-05	1e-05	1e-05	1e-05	1e-05	1e-05	1e-05	1e-05	1e-05	1e-05	1e-05	1e-05	1e-05	1e-05
NiO	0.00191	0.0085	0.01285	1e-05	1e-05	1e-05	0.00616	0.00569	1e-05	0.00625	0.01756	0.00591	0.01388	0.00416	0.0149	0.00297	1e-05	1e-05	0.007	1e-05	1e-05	0.01631	0.00192	1e-05	1e-05	0.0052	1e-05	0.0095	1e-05	1e-05	1e-05	0.00743	0.00397	1e-05	1e-05	0.01194	0.00528	0.00612	1e-05	1e-05	0.01296	1e-05	0.00085	0.00119	0.00523	1e-05	0.00238	0.00047	1e-05
Total	100.707	100.97	100.36	100.683	100.7	100.52	100.519	99.7174	100.762	100.176	98.9875	99.067	100.834	100.174	100.258	100.475	99.5626	100.389	98.6225	97.8775	100.556	100.576	100.38	100.539	100.294	100.287	99.5894	100.405	100.533	100.215	100.514	101.033	101.473	100.556	100.611	100.862	100.113	100.87	96.9871	99.5617	100.475	100.944	99.692	100.732	100.323	100.781	99.1145	100.181	99.2008
O	6	6	6	6	6	6	6	6	6	6	6	6	6	6	6	6	6	6	6	6	6	6	6	6	6	6	6	6	6	6	6	6	6	6	6	6	6	6	6	6	6	6	6	6	6	6	6	6	6
Si	1.98	1.9845	1.9815	1.9815	1.9785	1.9875	1.9845	1.9905	1.9815	1.98	1.986	1.98	1.977	1.9875	1.98	1.9875	1.9845	1.9785	1.9695	1.968	1.98	1.9755	1.986	1.9815	1.9875	1.9875	1.9725	1.983	1.9815	1.9815	1.986	1.983	1.989	1.9785	1.98	1.9815	1.983	1.9785	1.893	1.9845	1.9725	1.9695	1.932	1.965	1.974	1.9725	1.9635	1.9635	1.9635
Ti	0.006	0.0075	0.009	0.0075	0.006	0.009	0.0105	0.0075	0.0075	0.006	0.009	0.009	0.009	0.006	0.006	0.0075	0.0075	0.0075	0.0075	0.0075	0.009	0.009	0.0075	0.006	0.0075	0.0075	0.009	0.009	0.006	0.006	0.0075	0.006	0.0075	0.006	0.0075	0.0075	0.0075	0.009	0.009	0.0075	0.009	0.009	0.0195	0.0105	0.009	0.012	0.012	0.012	0.012
Al	0.018	0.018	0.018	0.021	0.018	0.018	0.0195	0.0285	0.0195	0.018	0.024	0.0195	0.0195	0.018	0.021	0.018	0.033	0.021	0.0225	0.027	0.0225	0.0225	0.0195	0.021	0.021	0.0225	0.0225	0.024	0.024	0.024	0.024	0.024	0.024	0.0225	0.0255	0.024	0.0255	0.024	0.021	0.039	0.0345	0.036	0.06	0.039	0.036	0.036	0.0465	0.045	0.0375
Cr	0	0	0	0	0	0	0	0	0	0	0	0	0	0	0	0	0	0	0	0	0	0	0	0	0	0	0	0	0.0015	0	0	0	0	0	0	0	0	0	0	0	0	0	0	0	0	0	0	0	0
Fe2	1.212	1.203	1.1955	1.1985	1.2075	1.191	1.1895	1.1805	1.203	1.1985	1.182	1.2	1.1955	1.1955	1.209	1.191	1.1325	1.206	1.2105	1.1805	1.173	1.173	1.197	1.2	1.1835	1.1115	1.119	1.1115	1.1175	1.1175	1.113	1.113	1.11	1.128	1.1205	1.113	1.1115	1.125	1.2315	0.876	0.792	0.7905	0.792	0.8055	0.777	0.783	0.7905	0.7815	0.807
Mn	0.0405	0.039	0.0405	0.0405	0.0405	0.0405	0.0405	0.0405	0.0405	0.0405	0.039	0.0405	0.0405	0.039	0.0405	0.042	0.039	0.039	0.0405	0.039	0.039	0.039	0.0405	0.0405	0.0405	0.036	0.0375	0.0375	0.0375	0.0375	0.0375	0.0375	0.0375	0.0375	0.039	0.0375	0.036	0.0375	0.0405	0.0285	0.0255	0.0255	0.0255	0.027	0.0255	0.0255	0.0255	0.0255	0.0255
Mg	0.534	0.534	0.5385	0.5325	0.5445	0.5355	0.537	0.5265	0.534	0.537	0.534	0.534	0.5385	0.5385	0.5325	0.5355	0.5205	0.5415	0.5415	0.5175	0.546	0.546	0.5325	0.537	0.54	0.603	0.618	0.609	0.6045	0.603	0.609	0.612	0.6045	0.6045	0.603	0.6135	0.6075	0.606	0.672	0.4665	0.4575	0.4575	0.4485	0.465	0.4605	0.453	0.456	0.465	0.4575
Ca	0.21	0.207	0.216	0.2175	0.21	0.21	0.213	0.21	0.2145	0.219	0.2145	0.2175	0.222	0.2115	0.2115	0.2115	0.2685	0.21	0.2145	0.2685	0.2235	0.237	0.213	0.213	0.2115	0.222	0.225	0.219	0.2235	0.2265	0.2175	0.2175	0.216	0.2235	0.222	0.2175	0.2205	0.2175	0.207	0.579	0.699	0.705	0.7305	0.687	0.7065	0.7065	0.699	0.699	0.6915
Na	0.0075	0.006	0.0045	0.006	0.003	0.006	0.0045	0.006	0.006	0.006	0.0045	0.0045	0.0045	0.0045	0.006	0.006	0.009	0.0045	0.0075	0.0075	0.0075	0.0045	0.0045	0.003	0.006	0.0075	0.0075	0.0045	0.006	0.0045	0.003	0.006	0.0075	0.006	0.0045	0.006	0.0045	0.006	0.0225	0.015	0.0165	0.018	0.018	0.0165	0.015	0.0165	0.018	0.018	0.018
K	0	0	0	0	0	0	0	0	0	0	0	0	0	0	0	0	0.0015	0	0	0	0	0	0	0	0	0	0	0	0	0	0	0	0	0	0	0	0	0	0	0	0	0	0	0	0	0	0	0	0
Ni	0	0	0	0	0	0	0	0	0	0	0	0	0	0	0	0	0	0	0	0	0	0	0	0	0	0	0	0	0	0	0	0	0	0	0	0	0	0	0	0	0	0	0	0	0	0	0	0	0
Total	4.008	4.0005	4.0035	4.0035	4.008	3.9975	3.999	3.9915	4.005	4.0065	3.9945	4.0035	4.0065	4.0005	4.0065	3.999	3.996	4.0065	4.0155	4.0155	4.002	4.0065	3.999	4.0035	3.9975	3.9975	4.011	3.999	4.002	4.002	3.996	4.0005	3.9945	4.008	4.002	4.002	3.999	4.0035	4.098	3.996	4.008	4.0125	4.026	4.014	4.0065	4.005	4.011	4.011	4.014
Enstatite	27.3006	27.4691	27.6154	27.3287	27.7523	27.653	27.6875	27.4648	27.3636	27.4751	27.6612	27.3636	27.5307	27.6793	27.2657	27.6316	27.0882	27.6628	27.5362	26.3158	28.1081	27.9141	27.4131	27.5385	27.907	31.1387	31.4985	31.3998	31.0717	30.9707	31.3998	31.5058	31.3131	30.9049	30.9946	31.5586	31.3225	31.1008	31.8408	24.2779	23.4796	23.4255	22.7549	23.7548	23.6883	23.3205	23.4387	23.9013	23.3896
Ferrosilite	61.9632	61.8827	61.3077	61.5089	61.5443	61.5027	61.3302	61.5806	61.6449	61.32	61.2277	61.4912	61.1196	61.4495	61.9048	61.4551	58.9383	61.6092	61.5561	60.0305	60.3861	59.9693	61.6216	61.5385	61.1628	57.3974	57.0336	57.3086	57.4402	57.396	57.3859	57.2973	57.4981	57.6687	57.5944	57.2531	57.3086	57.7367	58.3511	45.5894	40.6467	40.4762	40.1826	41.1494	39.9691	40.3089	40.6322	40.1696	41.2577
Wollastonite	10.7362	10.6481	11.0769	11.1624	10.7034	10.8443	10.9822	10.9546	10.9915	11.2049	11.1111	11.1453	11.3497	10.8712	10.8295	10.9133	13.9735	10.728	10.9077	13.6537	11.5058	12.1166	10.9653	10.9231	10.9302	11.464	11.4679	11.2916	11.488	11.6333	11.2142	11.1969	11.1888	11.4264	11.4109	11.1883	11.3689	11.1624	9.8081	30.1327	35.8737	36.0983	37.0624	35.0958	36.3426	36.3707	35.9291	35.9291	35.3528
total	100	100	100	100	100	100	100	100	100	100	100	100	100	100	100	100	100	100	100	100	100	100	100	100	100	100	100	100	100	100	100	100	100	100	100	100	100	100	100	100	100	100	100	100	100	100	100	100	100
Mg#	30.5842	30.7427	31.0554	30.7626	31.0788	31.0165	31.1034	30.8436	30.7427	30.9421	31.1189	30.7958	31.0554	31.0554	30.5771	31.0165	31.4882	30.9871	30.9075	30.477	31.7627	31.7627	30.7892	30.9154	31.3316	35.1706	35.5786	35.3967	35.1045	35.048	35.3659	35.4783	35.2581	34.8918	34.9869	35.5343	35.3403	35.0087	35.3034	34.7486	36.6146	36.6587	36.1548	36.5998	37.2121	36.6505	36.5824	37.3045	36.1803
McMullen Creek eruption
Sample ID	RC-10.1-005
Mineral phase	pigeonite	pigeonite	pigeonite	pigeonite	pigeonite	pigeonite	pigeonite	pigeonite	pigeonite	pigeonite	pigeonite	pigeonite	pigeonite	pigeonite	pigeonite	pigeonite	pigeonite	pigeonite	pigeonite	pigeonite	pigeonite	pigeonite	pigeonite	pigeonite	pigeonite	pigeonite	pigeonite	pigeonite	pigeonite	pigeonite	pigeonite	pigeonite	pigeonite	pigeonite	pigeonite	pigeonite	pigeonite	pigeonite	pigeonite	pigeonite	pigeonite	pigeonite	augite	augite	augite	augite	augite	augite	augite
SiO2	49.712	49.71	49.22	49.537	49.344	49.465	49.229	49.831	49.68	49.699	49.792	49.321	49.462	49.148	49.898	49.668	49.759	49.47	49.784	49.1	49.771	47.4358	49.0613	48.963	48.0095	47.4177	47.5012	48.6313	48.8647	48.5254	48.6375	47.928	47.0948	47.8348	49.1003	48.8982	47.9859	47.9702	48.5416	49.2621	49.1276	49.5039	48.8475	49.0806	48.5537	48.215	48.7936	47.6646	50.0739
TiO2	0.18	0.192	0.165	0.164	0.262	0.203	0.306	0.27	0.228	0.183	0.165	0.1	0.324	0.328	0.166	0.214	0.224	0.18	0.231	0.231	0.231	0.28757	0.2475	0.28624	0.22239	0.23058	0.21539	0.2316	0.18769	0.18951	0.23938	0.29796	0.2345	0.16458	0.2058	0.20981	0.23981	0.2276	0.28732	0.21851	0.21527	0.23583	0.47514	0.33257	0.38393	0.2657	0.44444	0.31641	0.39984
Al2O3	0.346	0.379	0.388	0.379	0.424	0.399	0.45	0.632	0.373	0.399	0.461	0.361	0.791	0.614	0.28	0.347	0.391	0.363	0.356	0.465	0.38	0.67855	0.45564	0.45551	0.38749	0.36871	0.38627	0.37044	0.36783	0.38586	0.37826	0.42022	0.36364	0.36066	0.3809	0.40566	0.39663	0.34303	0.51941	0.34378	0.35643	0.41492	1.01849	0.79657	0.9389	0.62558	1.01929	0.76665	0.9206
Cr2O3	0	0	0	0	0.035	0	0	0	0.006	0.018	0.042	0	0.037	0	0	0.024	0	0	0.026	0.009	0.018	0.0169	1e-05	0.00627	1e-05	0.00179	0.00596	0.00504	1e-05	1e-05	0.00298	1e-05	1e-05	1e-05	0.0269	1e-05	1e-05	1e-05	0.00417	1e-05	0.00264	1e-05	0.00761	1e-05	0.01147	0.00262	0.00192	1e-05	0.00803
FeO	33.353	33.689	33.378	33.8	33.349	33.382	32.581	28.943	32.956	33.025	33.346	31.99	27.229	29.856	32.88	32.668	33.819	33.73	33.413	33.327	31.998	33.3855	32.923	34.3024	34.4083	34.5913	34.3911	34.4415	34.5778	34.3266	34.3333	34.196	33.5342	34.2523	34.6236	34.4642	33.9501	34.1825	32.5172	34.8972	34.7389	33.8305	22.7924	26.2839	23.4282	30.3075	21.8134	27.3903	19.2033
MnO	1.08	1.102	1.014	1.035	1.109	1.049	1.068	1.036	1.092	1.147	1.035	1.062	0.848	0.962	1.098	1.042	0.958	1.076	1.11	1.055	0.968	1.01523	1.00159	1.05045	1.07662	1.04701	1.03856	1.04696	1.07325	1.07836	1.0427	1.04187	1.02369	1.09875	1.08008	1.07774	1.04644	1.06967	1.01157	1.09985	1.03867	1.04007	0.70467	0.81058	0.68947	0.92123	0.64301	0.80386	0.57566
MgO	10.622	10.604	10.349	10.698	10.552	10.621	10.521	9.864	10.483	10.609	10.409	10.692	9.975	10.079	11.57	10.326	10.709	10.462	10.706	10.748	11.43	9.90549	10.1335	10.2671	10.2749	10.4996	10.4072	10.5444	10.3831	10.3336	10.1021	10.3555	10.1539	10.4142	10.3346	10.2706	10.1378	10.3482	10.0392	10.4721	10.4267	10.0945	9.1417	9.49236	9.13504	9.7875	8.91983	9.31069	10.1181
CaO	4.23	4.279	4.355	4.29	4.317	4.701	4.708	8.767	4.572	4.199	4.23	4.094	9.842	8.412	3.943	4.646	4.264	4.416	4.472	4.561	4.416	4.4366	5.62102	4.60194	4.35978	3.95763	3.92079	3.87421	4.10561	4.40691	4.50531	4.4342	5.20174	4.07148	4.39801	4.40298	4.58877	4.17045	5.96084	3.93158	4.09321	4.98616	15.5397	11.9817	15.0523	8.09182	16.7657	11.4855	17.7504
Na2O	0.066	0.068	0.126	0.077	0.036	0.084	0.054	0.182	0.086	0.047	0.11	0.026	0.211	0.107	0.103	0.01	0.072	0.011	0.057	0.029	0.016	0.04978	0.07553	0.08926	0.04794	0.07976	0.06152	0.06024	0.05038	0.07752	0.07493	0.09286	0.07895	0.05569	0.0593	0.0534	0.05795	0.09628	0.09203	0.06459	0.04527	0.10621	0.24041	0.17101	0.19624	0.11506	0.24348	0.15135	0.23335
K2O	0	0.01	0.007	0	0.001	0.011	0.01	0.016	0.025	0.01	0.038	0.04	0	0.031	0	0.068	0	0.009	0	0	0.006	0.05693	1e-05	1e-05	1e-05	1e-05	1e-05	1e-05	1e-05	1e-05	1e-05	1e-05	1e-05	1e-05	1e-05	1e-05	1e-05	1e-05	1e-05	1e-05	1e-05	1e-05	1e-05	1e-05	1e-05	1e-05	1e-05	1e-05	1e-05
NiO	0	0	0	0	0.01	0	0.009	0	0	0	0	0	0.027	0.002	0.023	0.047	0.038	0	0.034	0	0	1e-05	0.00597	0.00779	1e-05	1e-05	0.01277	1e-05	1e-05	0.00745	1e-05	0.00931	0.00702	1e-05	0.00799	1e-05	1e-05	1e-05	1e-05	0.017	1e-05	1e-05	0.00134	0.00945	0.00326	1e-05	1e-05	1e-05	1e-05
Total	99.589	100.033	99.002	99.98	99.439	99.915	98.936	99.541	99.501	99.336	99.628	97.686	98.746	99.539	99.961	99.06	100.234	99.717	100.189	99.525	99.234	97.2683	99.5251	100.03	98.7869	98.1942	97.9408	99.2057	99.6104	99.3312	99.3164	98.7759	97.6925	98.2524	100.218	99.7827	98.4034	98.408	98.9734	100.307	100.045	100.212	98.7689	98.9587	98.3925	98.3321	98.6447	97.8893	99.2832
O	6	6	6	6	6	6	6	6	6	6	6	6	6	6	6	6	6	6	6	6	6	6	6	6	6	6	6	6	6	6	6	6	6	6	6	6	6	6	6	6	6	6	6	6	6	6	6	6	6
Si	1.99452	1.98906	1.99044	1.98474	1.98564	1.98246	1.9869	1.98594	1.9941	1.9965	1.99644	2.00682	1.97868	1.96824	1.98852	2.00052	1.98672	1.98786	1.98744	1.9761	1.99146	1.9635	1.977	1.971	1.9635	1.953	1.959	1.9725	1.9755	1.9695	1.974	1.959	1.95	1.965	1.974	1.974	1.9665	1.9665	1.9695	1.977	1.977	1.983	1.9485	1.965	1.9485	1.962	1.947	1.944	1.9605
Ti	0.00546	0.00576	0.00504	0.00492	0.00792	0.00612	0.0093	0.0081	0.0069	0.00552	0.00498	0.00306	0.00972	0.0099	0.00498	0.00648	0.00672	0.00546	0.00696	0.00702	0.00696	0.009	0.0075	0.009	0.0075	0.0075	0.006	0.0075	0.006	0.006	0.0075	0.009	0.0075	0.0045	0.006	0.006	0.0075	0.0075	0.009	0.006	0.006	0.0075	0.015	0.0105	0.012	0.0075	0.0135	0.009	0.012
Al	0.01638	0.01788	0.01848	0.01788	0.0201	0.01884	0.02142	0.0297	0.01764	0.0189	0.02178	0.01734	0.03732	0.02898	0.01314	0.0165	0.01842	0.01722	0.01674	0.02208	0.01794	0.033	0.021	0.021	0.018	0.018	0.0195	0.018	0.018	0.018	0.018	0.0195	0.018	0.018	0.018	0.0195	0.0195	0.0165	0.0255	0.0165	0.0165	0.0195	0.048	0.0375	0.045	0.03	0.048	0.0375	0.042
Cr	0	0	0	0	0.00114	0	0	0	0.00018	0.0006	0.00132	0	0.0012	0	0	0.00078	0	0	0.00084	0.0003	0.00054	0	0	0	0	0	0	0	0	0	0	0	0	0	0.0015	0	0	0	0	0	0	0	0	0	0	0	0	0	0
Fe2	1.11912	1.12734	1.1289	1.13256	1.12236	1.11894	1.09974	0.96468	1.10628	1.10952	1.11822	1.08858	0.91098	0.99996	1.09584	1.10046	1.12926	1.13352	1.11558	1.12176	1.07076	1.1565	1.11	1.155	1.176	1.1925	1.1865	1.1685	1.1685	1.1655	1.1655	1.1685	1.161	1.176	1.164	1.164	1.164	1.1715	1.1025	1.1715	1.1685	1.134	0.7605	0.8805	0.786	1.032	0.7275	0.9345	0.6285
Mn	0.03672	0.03738	0.03474	0.0351	0.0378	0.03564	0.03654	0.03498	0.03714	0.03906	0.03516	0.0366	0.02874	0.03264	0.03708	0.03558	0.0324	0.0366	0.03756	0.03594	0.03282	0.036	0.0345	0.036	0.0375	0.036	0.036	0.036	0.0375	0.0375	0.036	0.036	0.036	0.0375	0.0375	0.0375	0.036	0.0375	0.0345	0.0375	0.036	0.036	0.024	0.027	0.024	0.0315	0.021	0.0285	0.0195
Mg	0.63528	0.63252	0.62388	0.63894	0.633	0.63456	0.633	0.58602	0.62724	0.63534	0.62214	0.64854	0.59484	0.60168	0.6873	0.61998	0.63738	0.6267	0.63714	0.64482	0.68178	0.612	0.609	0.6165	0.6255	0.645	0.6405	0.6375	0.6255	0.6255	0.6105	0.6315	0.627	0.6375	0.6195	0.618	0.6195	0.633	0.6075	0.627	0.6255	0.603	0.543	0.567	0.546	0.594	0.531	0.5655	0.591
Ca	0.18186	0.18348	0.1887	0.1842	0.18612	0.2019	0.20358	0.3744	0.19662	0.18072	0.18174	0.1785	0.42186	0.36096	0.16836	0.20052	0.1824	0.19014	0.19128	0.19668	0.1893	0.1965	0.243	0.198	0.1905	0.174	0.174	0.168	0.1785	0.192	0.1965	0.1935	0.231	0.1785	0.189	0.1905	0.201	0.183	0.2595	0.1695	0.177	0.2145	0.6645	0.5145	0.648	0.3525	0.717	0.5025	0.744
Na	0.00516	0.00528	0.0099	0.006	0.00282	0.00654	0.0042	0.01404	0.00672	0.00366	0.00858	0.00204	0.01638	0.00828	0.00798	0.00078	0.00558	0.00084	0.00444	0.00228	0.00126	0.0045	0.006	0.0075	0.0045	0.006	0.0045	0.0045	0.0045	0.006	0.006	0.0075	0.006	0.0045	0.0045	0.0045	0.0045	0.0075	0.0075	0.0045	0.003	0.009	0.018	0.0135	0.015	0.009	0.0195	0.012	0.018
K	0	0.00054	0.00036	0	6e-05	0.00054	0.00054	0.00084	0.00126	0.00054	0.00192	0.0021	0	0.00156	0	0.00348	0	0.00048	0	0	0.0003	0.003	0	0	0	0	0	0	0	0	0	0	0	0	0	0	0	0	0	0	0	0	0	0	0	0	0	0	0
Ni	0	0	0	0	0.0003	0	0.0003	0	0	0	0	0	0.00084	6e-05	0.00072	0.0015	0.0012	0	0.00108	0	0	0	0	0	0	0	0	0	0	0	0	0	0	0	0	0	0	0	0	0	0	0	0	0	0	0	0	0	0
Total	3.99444	3.99912	4.00038	4.00434	3.99726	4.00554	3.99546	3.99858	3.99408	3.9903	3.99228	3.98352	4.00056	4.01232	4.00392	3.98652	4.00014	3.99876	3.999	4.00692	3.99312	4.014	4.008	4.0125	4.023	4.0335	4.026	4.014	4.0125	4.0185	4.0125	4.026	4.0365	4.023	4.0125	4.0125	4.0185	4.0215	4.014	4.011	4.0095	4.0035	4.0215	4.014	4.0245	4.0185	4.0245	4.0335	4.0155
Enstatite	32.8096	32.5481	32.1342	32.6707	32.604	32.4517	32.6909	30.441	32.4971	32.9947	32.3677	33.8554	30.8578	30.6573	35.2191	32.2745	32.7023	32.1325	32.7747	32.8444	35.11	31.145	31.0398	31.3024	31.4006	32.0656	32.009	32.2948	31.711	31.5431	30.9506	31.678	31.055	32.003	31.4068	31.3308	31.2169	31.8491	30.8454	31.8598	31.7352	30.8993	27.5915	28.8991	27.5758	30.0227	26.8793	28.2397	30.0993
Ferrosilite	57.798	58.0104	58.1464	57.9107	57.8095	57.2231	56.7954	50.1106	57.316	57.62	58.177	56.8265	47.2578	50.9508	56.1537	57.287	57.9393	58.1185	57.3858	57.1376	55.1415	58.855	56.5749	58.6443	59.0361	59.2841	59.2954	59.1945	59.2395	58.7746	59.0875	58.6155	57.5037	59.0361	59.0114	59.0114	58.6546	58.9434	55.9787	59.5274	59.2846	58.1091	38.6433	44.8777	39.697	52.1607	36.8261	46.6667	32.0092
Wollastonite	9.39233	9.44148	9.71939	9.41862	9.5865	10.3253	10.5138	19.4483	10.1868	9.38522	9.45528	9.31813	21.8843	18.3919	8.62721	10.4385	9.35845	9.74897	9.83951	10.018	9.74849	10	12.3853	10.0533	9.56325	8.65026	8.69565	8.51064	9.04943	9.6823	9.96198	9.70655	11.4413	8.96084	9.58175	9.65779	10.1285	9.20755	13.1759	8.6128	8.98021	10.9915	33.7652	26.2232	32.7273	17.8165	36.2946	25.0936	37.8915
total	100	100	100	100	100	100	100	100	100	100	100	100	100	100	100	100	100	100	100	100	100	100	100	100	100	100	100	100	100	100	100	100	100	100	100	100	100	100	100	100	100	100	100	100	100	100	100	100	100
Mg#	36.2107	35.9415	35.5937	36.0677	36.061	36.1882	36.5317	37.7907	36.183	36.4121	35.7478	37.3342	39.5027	37.5665	38.5444	36.0361	36.0787	35.6035	36.3515	36.501	38.9024	34.6056	35.4276	34.801	34.7211	35.102	35.0575	35.299	34.8662	34.9246	34.375	35.0833	35.0671	35.153	34.7351	34.6801	34.7351	35.079	35.5263	34.8624	34.8662	34.715	41.6571	39.171	40.991	36.5314	42.1931	37.7	48.4625
[truncated: 300 more columns]

## Sheet: Table S4_Paleomag site means
Table S4. Site mean thermoremanent magnetic (TRM) directions for the Grey's Landing and McMullen Creek super-eruption deposits, and other adjacent units for comparison. TRM directions presented in both geographic (uncorrected) and stratigraphic (tilt corrected) formats.
Table S4a: Greys Landing Correlatives
	Locality ID	Latitude/Longtitude	N	R	a95	GeoDec	GeoInc	StratDec	StratInc	Best-fit tilt correction (dip and strike)	Measured dip and strike
	House Creek#	42.156111° -114.983055°	10	9.97447	2.57657	339.5	57.5	-	-	-	-
	Three Creek	42.072500° -115.162500°	10	9.98324	2.08676	335.6	57	-	-	-	02.088
	Salmon Dam#	42.211623° -114.735037°	25	24.1045	5.69699	338.5	59.2	-	-	-	-
	Backwaters Rec. area#	42.341944° -114.281944°	35	34.6696	2.40091	337.1	56.6	-	-	-	03.048
	"Buzzard", East of Highway 93#	42.087222° -114.653333°	9	8.93661	4.6006	336.7	55.8	-	-	-	05.210
	Rock Creek, Little Creek	42.341944° -114.281944°	25	24.7101	3.20027	327.7	62.7	336.235	54.8803	09.275	12.280
	Dry Gulch quarry	42.415833° -114.327222°	9	8.88201	6.29741	316.9	59.3	333.158	55.5956	11.306	15.320
	Trapper Creek	42.178889° -113.963889°	9	8.97468	2.90119	323.7	55.8	327.203	57.3911	03.035	05.039
	Oakley Hills, Oakley graben	42.282500° -113.839167°	10	9.97525	2.53683	333	49.2	337.518	53.0585	05.022	07.036
	Gwin Spring.	43.193055° -114.656111°	10	9.9589	3.27161	353.8	52.3	343	53	-	08.160
	Tivm, Lake Hills	43.367500° -113.923333°	7	6.98112	3.39136	344.6	48.4	338.615	54.185	08.111	05.111
Table S4b: McMullen Creek Correlatives
	Locality ID	Latitude/Longtitude	N	R	a95	GeoDec	GeoInc	StratDec	StratInc	Best-fit tilt correction (rotation and declination)	Measured dip and strike
	Rock Creek, Little Creek	42.341944° -114.281944°	7	6.99406	1.90096	357.9	62.9	359	53.6185	09.275	12.280
	Dry Gulch quarry	42.415833° -114.327222°	9	8.95034	4.06853	349.6	64.5	1.90839	56.0284	11.306	15.320
	Trapper Creek	42.178889° -113.963889°	10	9.98885	1.70105	357.8	57.1	2.13641	57.1016	03.035	05.039
	Oakley Hills, Oakley graben	42.282500° -113.839167°	10	9.98895	1.69361	353.6	55.5	0.917739	57.7165	05.022	07.036
	Tivo, Lake Hills	42.367500° -113.923333°	8	7.98897	2.20094	3.2	50.4	0	57.4603	08.111	05.111
Table S4c: Other plotted Stratigraphically adjacent units
	Unit Name	Locality ID	Latitude/Longtitude	N	R	a95	GeoDec	GeoInc	StratDec	StratInc	Best-fit tilt correction (rotation and declination)	Measured dip and strike
	Tuff of Thorn Creek	Thorn Creek, Lake Hills	43.192222° -114.656667°	10	9.9836	2.06378	346.4	69.2	326	69.2	-	08.160
	*Castleford Crossing Ignimbrite	Castleford Crossing	42.545000° -114.953889°	10	9.93243	4.20095	8.4	62.7	8.4	62.7	-	03.062
	*Dry Gulch Member	Dry Gulch quarry	42.415833° -114.327222°	19	18.682	4.49989	194.1	-77.3	203.765	-66.7731	11.306	15.320
	*Indian Springs Member	Rock Creek, Little Creek	42.341944° -114.281944°	11	10.9511	3.20121	321	58	329.46	50.8397	09.275	12.280
#Reference sites within or around Rogerson graben
*Data from Knott et al., (2016a)

## Sheet: Table S5_U-Pb results
Table S5. Zircon U-Pb isotopic data for the (a) Grey's Landing and (b) McMullen Creek super-eruption deposits. Data presented under different scenarios for common Pb (PbC) corrections (see italic table headings and supplementary text for explanation)
(a) Grey’s Landing Ignimbrite (basal vitrophyre; Sample RG001)
RG001 (No Initial PbC correction)
	Composition					Isotopic Ratios								Dates (Ma)
														206Pb/
	mass	Th/	Pb*	Pbc	Pb*/	206Pb/	208Pb/	206Pb/		207Pb/		207Pb/		238U	±2σ	206Pb/	±2σ	207Pb/	±2σ	207Pb/	±2σ	Corr.
Fraction	U(pg)	U a	(pg) b	(pg) c	Pbc d	204Pb e	206Pb f	238U f	±2σ %	235U f	±2σ %	206Pb f	±2σ %	<Th> g	abs	238U h	abs	235U h	abs	206Pb h	abs	coef.	% disc i
Zircon
GL1	1355.55	0.621304	2.09197	0.670043	3.12214	200.106	0.20094	0.00143643	0.331902	0.00939409	3.43689	0.0474528	3.37753	9.3467	0.0307782	9.2532	0.0306895	9.49408	0.32478	71.0147	80.3331	0.22513	86.97
GL2	434.142	0.479427	0.628299	0.407991	1.53998	111.11	0.155163	0.0013956	0.74192	0.00964537	8.33772	0.0501476	8.06521	9.0874	0.0663783	8.99035	0.0666547	9.74681	0.808774	200.804	187.269	0.405706	95.5228
GL21-27	494.683	1.07759	0.818103	1.05089	0.778485	58.6959	0.348223	0.00137698	1.42157	0.00876365	15.6063	0.0461796	15.3386	8.95256	0.125994	8.87046	0.126013	8.8597	1.37666	5.93394	369.312	0.232242	-49.4869
GL44-36	193.927	0.743127	0.29973	0.868524	0.345103	37.5051	0.240347	0.00138764	3.19827	0.0102423	32.1336	0.053557	31.1846	9.02953	0.284411	8.93907	0.285697	10.347	3.30798	351.46	704.723	0.342094	97.4566
M-NI-1	272.318	0.433109	0.371568	0.526516	0.705712	61.6675	0.14025	0.00134497	1.48164	0.00724412	22.6724	0.0390811	22.0663	8.7626	0.127606	8.66438	0.128289	7.32905	1.65569	-412.505	576.989	0.436308	102.1
M-NI-2	353.154	0.678264	0.551678	0.607627	0.907922	70.2114	0.219336	0.00143159	1.11169	0.00956059	12.1969	0.0484571	11.9688	9.31412	0.102246	9.22204	0.102448	9.66155	1.17282	120.595	282.041	0.248785	92.3529
M-NI-3	812.615	0.883911	1.36063	4.05298	0.335712	36.1351	0.285671	0.00143623	3.56784	0.013508	39.347	0.0682431	38.0638	9.33884	0.328313	9.25191	0.329856	13.624	5.32483	875.022	788.114	0.399128	98.9427
MNI-4	4520.31	0.68806	6.72736	0.454357	14.8063	866.641	0.222616	0.0013618	0.122622	0.00883727	0.940987	0.0470865	0.873532	8.8646	0.0112588	8.77276	0.01075	8.93379	0.0836971	52.5537	20.8621	0.591006	83.3071
MNI-5	541.188	0.792046	0.850134	0.668169	1.27233	89.1023	0.256111	0.00139966	0.830769	0.00917352	9.41688	0.0475559	9.20635	9.10574	0.0747557	9.01651	0.074854	9.27217	0.869174	76.1739	218.749	0.294626	88.1633
MNI-A	250.333	0.67765	0.383747	0.774504	0.495474	46.4289	0.21919	0.00139943	1.95598	0.0103157	18.803	0.0534858	18.5371	9.1071	0.175905	9.015	0.176208	10.4207	1.94938	348.454	419.132	0.18699	97.4129
MNI-B	377.212	0.757902	0.603238	2.08313	0.289583	34.3191	0.245039	0.00143013	3.38465	0.0106311	31.8488	0.0539381	31.463	9.30271	0.311165	9.21262	0.311592	10.7377	3.4018	367.462	709.006	0.166429	97.4929
z1	426.179	0.557012	0.616004	2.78585	0.221119	31.263	0.180265	0.00137385	4.29734	0.00803099	51.6726	0.0424152	50.9267	8.94546	0.379091	8.85034	0.380068	8.12196	4.18009	-202.937	1276.75	0.213903	104.361
z3	482.849	0.543823	0.730218	1.16069	0.629125	55.4658	0.175921	0.00143414	1.5242	0.0098	15.8651	0.0495823	15.6068	9.33389	0.14039	9.23845	0.140711	9.90231	1.56337	174.416	364.133	0.216054	94.7032
z4	253.877	0.572292	0.389987	0.873578	0.446424	44.475	0.185096	0.00144906	2.20545	0.00935126	26.4044	0.0468249	25.9102	9.42921	0.205029	9.33448	0.205719	9.45099	2.4839	39.2361	619.928	0.263743	76.2095
z11	9657.07	0.577964	15.0725	0.859987	17.5264	1052.12	0.186899	0.00147023	0.137294	0.00947275	0.687763	0.0467501	0.632505	9.56535	0.0132976	9.47077	0.0129933	9.5732	0.0655315	35.4123	15.1641	0.480574	73.2557
z15	553.771	0.606966	0.853132	0.828478	1.02976	78.2937	0.196308	0.00143785	0.930987	0.00965509	9.9144	0.048723	9.766	9.3562	0.0860302	9.26234	0.0861692	9.75659	0.962675	133.475	229.584	0.205109	93.0606
z16	366.897	0.817565	0.579987	0.551952	1.05079	76.2979	0.264347	0.0013979	0.962011	0.00946679	10.1171	0.049138	9.96612	9.09378	0.0865221	9.00518	0.0865704	9.56721	0.963379	153.377	233.429	0.203267	94.1287
z18	242.17	0.595484	0.358759	0.531206	0.675366	57.881	0.192665	0.00139326	1.55182	0.00824279	19.2574	0.0429273	18.792	9.06945	0.138641	8.9753	0.139184	8.33528	1.59859	-172.94	468.352	0.336564	105.19
z22	198.747	0.648322	0.293145	0.847435	0.345921	38.1084	0.209782	0.00136218	2.82816	0.00907392	31.1527	0.0483342	30.6051	8.868	0.247351	8.77517	0.248007	9.17196	2.84445	114.608	721.998	0.237329	92.3433
z23	223.494	0.649963	0.330356	1.57014	0.2104	30.2323	0.210314	0.00136093	4.54765	0.00968831	44.726	0.0516541	44.1473	8.85995	0.397681	8.76715	0.398428	9.78999	4.35763	269.104	1012.44	0.177261	96.7421
z24	120.371	0.636187	0.214509	0.681714	0.314661	36.2267	0.205477	0.00163913	3.32298	0.013046	34.2218	0.0577505	33.1658	10.651	0.34931	10.5579	0.350549	13.161	4.47487	519.329	727.935	0.36142	97.967
z26	489.699	0.531162	0.713598	0.305832	2.3333	157.461	0.17189	0.00138965	0.546978	0.00896657	7.228	0.0468181	6.97166	9.04779	0.048653	8.95203	0.0489317	9.06393	0.652225	38.892	166.817	0.498034	76.9823
z29	169.366	0.525262	0.247035	0.417896	0.591139	53.4916	0.169977	0.00139431	1.68916	0.00880553	21.4219	0.0458237	20.9256	9.07792	0.150987	8.98201	0.151615	8.90185	1.89861	-12.7278	505.621	0.329853	170.57
z30	115.009	0.596053	0.161223	0.342228	0.471098	45.8882	0.192965	0.00132025	2.00991	0.00743985	26.6584	0.0408884	26.294	8.59941	0.170364	8.50527	0.170836	7.52633	1.99898	-295.695	671.47	0.217737	102.876
z31	1178.37	0.610145	1.8518	0.365079	5.07231	314.784	0.197292	0.00146762	0.195187	0.00949809	2.13685	0.0469586	2.10881	9.54773	0.0186585	9.45395	0.0184393	9.59869	0.204143	46.0569	50.3966	0.187131	79.4733
RG001 (Correction for PbC Lab blank 0.3 ±0.1 (2σ) pg)
	Composition					Isotopic Ratios								Dates (Ma)
														206Pb/
	mass	Th/	Pb*	Pbc	Pb*/	206Pb/	208Pb/	206Pb/		207Pb/		207Pb/		238U	±2σ	206Pb/	±2σ	207Pb/	±2σ	207Pb/	±2σ	Corr.
Fraction	U(pg)	U a	(pg) b	(pg) c	Pbc d	204Pb e	206Pb f	238U f	±2σ %	235U f	±2σ %	206Pb f	±2σ %	<Th> g	abs	238U h	abs	235U h	abs	206Pb h	abs	coef.	% disc i
Zircon
GL1	1355.55	0.606852	2.08023	0.677883	3.06872	200.106	0.196277	0.00143422	0.206587	0.00930421	2.00451	0.0470715	1.93321	9.33279	0.0192238	9.23892	0.0190727	9.40366	0.187627	51.7893	46.1513	0.389254	82.1605
GL2	434.142	0.465685	0.624875	0.410279	1.52305	111.11	0.150723	0.00139358	0.650278	0.00956346	7.48623	0.0497939	7.17553	9.07474	0.0579646	8.97734	0.0583371	9.66444	0.72007	184.343	167.114	0.511204	95.1301
GL21-27	494.683	0.997062	0.794293	1.0668	0.744555	58.6959	0.322303	0.00136465	0.675882	0.00826386	7.52204	0.0439395	7.1676	8.87519	0.0592638	8.79108	0.0593769	8.3565	0.626	-115.182	176.637	0.556888	107.632
GL44-36	193.927	0.582055	0.281702	0.88057	0.319909	37.5051	0.188372	0.00136382	1.96166	0.00927708	23.0498	0.0493568	21.7843	8.88025	0.170094	8.78576	0.172229	9.37636	2.15129	163.771	509.258	0.669974	94.6353
M-NI-1	272.318	0.38506	0.364386	0.531315	0.685818	61.6675	0.124715	0.00133821	1.12125	0.00697025	19.3974	0.0377935	18.6917	8.7203	0.0956695	8.62088	0.0965974	7.05292	1.36334	-500.907	497.724	0.646822	101.721
M-NI-2	353.154	0.632108	0.541923	0.614145	0.882403	70.2114	0.204446	0.00142452	0.683129	0.00927378	8.12385	0.0472369	7.85042	9.26972	0.0623239	9.17649	0.0626427	9.37304	0.757948	60.1583	187.093	0.435476	84.7461
M-NI-3	812.615	0.640049	1.24163	4.13249	0.300455	36.1351	0.20705	0.00139871	2.13678	0.0119874	36.9457	0.0621852	35.4661	9.10343	0.189595	9.01039	0.192398	12.0994	4.44367	679.53	757.792	0.707507	98.674
MNI-4	4520.31	0.686169	6.72247	0.457627	14.6898	866.641	0.222006	0.00136152	0.114445	0.00882602	0.79812	0.0470362	0.718063	8.86286	0.0105682	8.77098	0.0100312	8.92248	0.0709001	50.001	17.163	0.7304	82.4584
MNI-5	541.188	0.755644	0.83846	0.67597	1.24038	89.1023	0.244375	0.00139414	0.500521	0.00894953	6.26972	0.0465786	6.00737	9.07108	0.0447487	8.98093	0.0449201	9.04678	0.564689	26.6071	144.078	0.552953	66.2461
MNI-A	250.333	0.574313	0.368701	0.784558	0.469947	46.4289	0.18584	0.00138403	0.927006	0.00969157	9.55167	0.050809	9.26599	9.01056	0.0821345	8.91587	0.0825936	9.79327	0.930924	231.143	213.964	0.352032	96.1427
MNI-B	377.212	0.503791	0.546696	2.12091	0.257765	34.3191	0.163042	0.00139173	1.03555	0.00907467	9.52617	0.0473117	9.16751	9.06187	0.0920883	8.96542	0.092777	9.17271	0.869874	63.9291	218.327	0.39413	85.976
z1	426.179	0.221545	0.53718	2.83852	0.189247	31.263	0.0717964	0.00132647	1.65917	0.00611048	23.6527	0.033425	22.5798	8.64881	0.140147	8.54529	0.141687	6.1856	1.45861	-839.816	646.196	0.667033	101.018
z3	482.849	0.447778	0.702926	1.17892	0.596244	55.4658	0.144905	0.00141966	0.670478	0.00921309	7.57954	0.0470883	7.25778	9.24308	0.0608525	9.14524	0.0612733	9.31199	0.702579	52.6432	173.214	0.513828	82.6279
z4	253.877	0.451839	0.371799	0.885731	0.419765	44.475	0.146205	0.00143071	1.15675	0.00860738	17.9368	0.0436529	17.3463	9.31408	0.105442	9.21634	0.106534	8.70239	1.55426	-131.335	428.819	0.534329	107.017
z11	9657.07	0.574955	15.0547	0.871852	17.2676	1052.12	0.185928	0.00146976	0.12883	0.00945366	0.443924	0.0466708	0.358284	9.56239	0.01251	9.46774	0.0121884	9.554	0.0422136	31.3473	8.62003	0.736576	69.7973
z15	553.771	0.556232	0.836375	0.839675	0.996069	78.2937	0.179934	0.0014301	0.439149	0.00934087	5.04283	0.0473929	4.87346	9.30757	0.0402521	9.21244	0.0404274	9.44054	0.473865	68.0087	115.976	0.422521	86.454
z16	366.897	0.780869	0.571998	0.55729	1.02639	76.2979	0.252518	0.00139233	0.594477	0.00924069	6.43429	0.0481566	6.26274	9.05878	0.0531606	8.96927	0.0532832	9.33975	0.598191	105.915	147.984	0.330786	91.5317
z18	242.17	0.54305	0.351427	0.536105	0.65552	57.881	0.175737	0.00138551	1.11968	0.00792844	14.7859	0.0415213	14.2159	9.02083	0.0990739	8.92537	0.0998668	8.01865	1.18096	-256.62	360.211	0.537045	103.478
z22	198.747	0.492813	0.275787	0.859034	0.321043	38.1084	0.159563	0.0013398	1.38254	0.00816701	18.6506	0.0442299	17.9693	8.72785	0.118165	8.63112	0.119249	8.25897	1.5341	-98.9748	441.44	0.5208	108.721
z23	223.494	0.323274	0.290081	1.59705	0.181636	30.2323	0.104744	0.00131476	1.55805	0.00781711	16.7724	0.0431411	16.1305	8.5709	0.130755	8.46994	0.131879	7.9065	1.32096	-160.572	401.047	0.450518	105.275
z24	120.371	0.487074	0.202405	0.689802	0.293425	36.2267	0.157396	0.00161337	2.0939	0.0120019	27.4501	0.0539768	26.1374	10.4889	0.215444	10.3921	0.217424	12.1139	3.30553	369.077	588.827	0.650061	97.1843
z26	489.699	0.530506	0.713413	0.305955	2.33176	157.461	0.171678	0.00138955	0.562464	0.00896265	7.27391	0.0468009	6.99684	9.04719	0.0499539	8.95141	0.0503135	9.05999	0.656084	38.0119	167.447	0.521753	76.451
z29	169.366	0.486848	0.243296	0.420394	0.578734	53.4916	0.15757	0.00138865	1.37656	0.00857634	18.6555	0.0448127	18.0767	9.04247	0.122131	8.94561	0.123056	8.67114	1.61076	-66.9135	441.338	0.450841	113.369
z30	115.009	0.574854	0.159884	0.343122	0.465968	45.8882	0.186118	0.00131727	1.87787	0.00731895	24.8343	0.0403151	24.3808	8.58074	0.158374	8.48606	0.159253	7.40448	1.83216	-331.887	627.159	0.277112	102.557
z31	1178.37	0.607283	1.84973	0.366458	5.0476	314.784	0.196369	0.00146717	0.172969	0.00947991	1.85691	0.046883	1.82223	9.54491	0.0165539	9.45106	0.0163354	9.5804	0.177062	42.2069	43.5812	0.243546	77.6078
RG001 (Correction for PbC Lab blank 0.5 ±0.2 (2σ) pg)
	Composition					Isotopic Ratios								Dates (Ma)
														206Pb/
	mass	Th/	Pb*	Pbc	Pb*/	206Pb/	208Pb/	206Pb/		207Pb/		207Pb/		238U	±2σ	206Pb/	±2σ	207Pb/	±2σ	207Pb/	±2σ	Corr.
Fraction	U(pg)	U a	(pg) b	(pg) c	Pbc d	204Pb e	206Pb f	238U f	±2σ %	235U f	±2σ %	206Pb f	±2σ %	<Th> g	abs	238U h	abs	235U h	abs	206Pb h	abs	coef.	% disc i
Zircon
GL1	1355.55	0.614668	2.08657	0.673646	3.09743	200.106	0.198799	0.00143541	0.281189	0.00935279	2.79053	0.0472777	2.71499	9.34031	0.0260365	9.24664	0.0259819	9.45253	0.262552	62.2154	64.6833	0.314731	85.1377
GL2	434.142	0.479427	0.628299	0.407991	1.53998	111.11	0.155163	0.0013956	0.74192	0.00964537	8.33772	0.0501476	8.06521	9.0874	0.0663783	8.99035	0.0666547	9.74681	0.808774	200.804	187.269	0.405706	95.5228
GL21-27	494.683	1.01865	0.800635	1.06256	0.753493	58.6959	0.329252	0.00136793	0.857851	0.00839698	9.48835	0.0445401	9.15185	8.8958	0.0753453	8.81223	0.0755441	8.49055	0.802254	-81.8329	224.085	0.430442	110.769
GL44-36	193.927	0.639333	0.288044	0.876332	0.328693	37.5051	0.206862	0.0013722	2.38378	0.00961665	25.8814	0.050851	24.6786	8.93275	0.208498	8.83969	0.210574	9.71793	2.50314	233.051	569.662	0.538876	96.207
M-NI-1	272.318	0.427509	0.370728	0.527078	0.703364	61.6675	0.138439	0.00134417	1.51715	0.00721206	22.5986	0.0389311	21.9059	8.75765	0.130253	8.65929	0.131286	7.29673	1.64305	-422.575	573.975	0.483142	102.049
M-NI-2	353.154	0.662166	0.548265	0.609907	0.898932	70.2114	0.214143	0.00142912	1.00571	0.00946024	10.8798	0.0480316	10.5877	9.29858	0.0920602	9.2061	0.0925209	9.56062	1.03529	99.7699	250.463	0.332734	90.7727
M-NI-3	812.615	0.653363	1.24797	4.12826	0.302299	36.1351	0.211346	0.00140071	2.14427	0.0120684	36.7786	0.0625162	35.302	9.11597	0.190564	9.02326	0.193348	12.1807	4.45312	690.863	752.882	0.703923	98.6939
MNI-4	4520.31	0.68806	6.72736	0.454357	14.8063	866.641	0.222616	0.0013618	0.122622	0.00883727	0.940987	0.0470865	0.873532	8.8646	0.0112588	8.77276	0.01075	8.93379	0.0836971	52.5537	20.8621	0.591006	83.3071
MNI-5	541.188	0.775453	0.844801	0.671733	1.25765	89.1023	0.250762	0.00139714	0.700708	0.00907121	7.98004	0.0471105	7.72015	9.08991	0.0627567	9.00026	0.0630215	9.16922	0.728414	53.7666	184.209	0.408676	83.2605
MNI-A	250.333	0.618138	0.375043	0.78032	0.480626	46.4289	0.199987	0.00139052	1.40354	0.00995462	13.5986	0.0519445	13.2656	9.05124	0.124971	8.95765	0.125637	10.0578	1.36096	281.946	303.523	0.285882	96.8229
MNI-B	377.212	0.532965	0.553038	2.11667	0.261277	34.3191	0.172464	0.00139604	1.20026	0.00924925	11.6729	0.0480731	11.3216	9.08886	0.107143	8.99315	0.107866	9.34836	1.08622	101.815	267.723	0.339664	91.1671
z1	426.179	0.249385	0.543522	2.83428	0.191767	31.263	0.0808091	0.00133028	1.73415	0.00626499	24.7881	0.034172	23.7588	8.67265	0.146985	8.56984	0.148515	6.34153	1.56705	-776.993	670.732	0.616197	101.103
z3	482.849	0.470264	0.709268	1.17469	0.603793	55.4658	0.152168	0.00142303	0.84547	0.00934948	9.24943	0.0476724	8.93512	9.26418	0.0769636	9.1669	0.0774483	9.44919	0.869942	81.9816	212.074	0.411076	88.8183
z4	253.877	0.494177	0.378141	0.881493	0.428977	44.475	0.159878	0.00143711	1.52534	0.00886677	20.5813	0.0447681	19.9851	9.35421	0.139969	9.25753	0.141107	8.96348	1.83669	-69.3463	488.161	0.422236	113.35
z11	9657.07	0.57603	15.0611	0.867614	17.3592	1052.12	0.186275	0.00146993	0.131371	0.00946048	0.51954	0.0466991	0.44577	9.56345	0.0127445	9.46882	0.0124302	9.56085	0.0494394	32.8006	10.7066	0.640431	71.1321
z15	553.771	0.575495	0.842717	0.835438	1.00871	78.2937	0.186152	0.00143303	0.636604	0.00945979	6.85923	0.047898	6.67826	9.32597	0.0584484	9.23132	0.0587249	9.56016	0.652676	93.1758	158.177	0.326807	90.0926
z16	366.897	0.810021	0.57834	0.553052	1.04572	76.2979	0.261916	0.00139675	0.942237	0.00942017	9.55225	0.0489363	9.33823	9.08656	0.0844081	8.99778	0.0847212	9.52031	0.905154	143.734	219.112	0.273866	93.74
z18	242.17	0.58844	0.357769	0.531867	0.672666	57.881	0.190392	0.00139222	1.57667	0.00820036	18.9774	0.0427385	18.4121	9.06289	0.140377	8.96856	0.141306	8.29255	1.56731	-183.94	459.876	0.394737	104.876
z22	198.747	0.550203	0.282128	0.854796	0.330053	38.1084	0.178103	0.00134797	1.93716	0.00849834	23.1353	0.0457452	22.4518	8.77904	0.166889	8.68375	0.168105	8.59261	1.97954	-16.8752	542.928	0.389478	151.459
z23	223.494	0.376171	0.296423	1.59281	0.186101	30.2323	0.121857	0.00132203	1.93233	0.00811175	21.0783	0.044521	20.4543	8.61638	0.163232	8.51674	0.164463	8.20331	1.72215	-82.8822	500.925	0.363998	110.276
z24	120.371	0.565773	0.208747	0.685564	0.304489	36.2267	0.182778	0.00162687	2.81166	0.0125489	30.9464	0.0559689	29.6689	10.5738	0.292348	10.4789	0.294394	12.6627	3.89432	450.146	658.98	0.490406	97.6721
z26	489.699	0.531162	0.713598	0.305832	2.3333	157.461	0.17189	0.00138965	0.546978	0.00896657	7.228	0.0468181	6.97166	9.04779	0.048653	8.95203	0.0489317	9.06393	0.652225	38.892	166.817	0.498034	76.9823
z29	169.366	0.525262	0.247035	0.417896	0.591139	53.4916	0.169977	0.00139431	1.68916	0.00880553	21.4219	0.0458237	20.9256	9.07792	0.150987	8.98201	0.151615	8.90185	1.89861	-12.7278	505.621	0.329853	170.57
z30	115.009	0.596053	0.161223	0.342228	0.471098	45.8882	0.192965	0.00132025	2.00991	0.00743985	26.6584	0.0408884	26.294	8.59941	0.170364	8.50527	0.170836	7.52633	1.99898	-295.695	671.47	0.217737	102.876
z31	1178.37	0.610145	1.8518	0.365079	5.07231	314.784	0.197292	0.00146762	0.195187	0.00949809	2.13685	0.0469586	2.10881	9.54773	0.0186585	9.45395	0.0184393	9.59869	0.204143	46.0569	50.3966	0.187131	79.4733
RG001 (Correction for PbC Lab blank 0.7 ±0.4 (2σ) pg)
	Composition					Isotopic Ratios								Dates (Ma)
														206Pb/
	mass	Th/	Pb*	Pbc	Pb*/	206Pb/	208Pb/	206Pb/		207Pb/		207Pb/		238U	±2σ	206Pb/	±2σ	207Pb/	±2σ	207Pb/	±2σ	Corr.
Fraction	U(pg)	U a	(pg) b	(pg) c	Pbc d	204Pb e	206Pb f	238U f	±2σ %	235U f	±2σ %	206Pb f	±2σ %	<Th> g	abs	238U h	abs	235U h	abs	206Pb h	abs	coef.	% disc i
Zircon
GL1	1355.55	0.621304	2.09197	0.670043	3.12214	200.106	0.20094	0.00143643	0.331902	0.00939409	3.43689	0.0474528	3.37753	9.3467	0.0307782	9.2532	0.0306895	9.49408	0.32478	71.0147	80.3331	0.22513	86.97
GL2	434.142	0.479427	0.628299	0.407991	1.53998	111.11	0.155163	0.0013956	0.74192	0.00964537	8.33772	0.0501476	8.06521	9.0874	0.0663783	8.99035	0.0666547	9.74681	0.808774	200.804	187.269	0.405706	95.5228
GL21-27	494.683	1.04013	0.806977	1.05833	0.762502	58.6959	0.336168	0.00137122	1.13463	0.0085301	11.9739	0.0451378	11.5821	8.9164	0.0996608	8.83337	0.100158	8.62459	1.02832	-49.2948	281.819	0.387006	117.919
GL44-36	193.927	0.695941	0.294386	0.872094	0.337562	37.5051	0.225127	0.00138058	3.03936	0.00995621	29.8938	0.0523271	28.6134	8.98527	0.267577	8.89362	0.270123	10.0594	2.99229	298.711	652.719	0.46309	97.0227
M-NI-1	272.318	0.433109	0.371568	0.526516	0.705712	61.6675	0.14025	0.00134497	1.48164	0.00724412	22.6724	0.0390811	22.0663	8.7626	0.127606	8.66438	0.128289	7.32905	1.65569	-412.505	576.989	0.436308	102.1
M-NI-2	353.154	0.678264	0.551678	0.607627	0.907922	70.2114	0.219336	0.00143159	1.11169	0.00956059	12.1969	0.0484571	11.9688	9.31412	0.102246	9.22204	0.102448	9.66155	1.17282	120.595	282.041	0.248785	92.3529
M-NI-3	812.615	0.66664	1.25431	4.12402	0.304148	36.1351	0.21563	0.00140271	2.17421	0.0121494	36.6683	0.0628463	35.1905	9.1285	0.193537	9.03613	0.196327	12.262	4.46922	702.083	749.125	0.695633	98.713
MNI-4	4520.31	0.68806	6.72736	0.454357	14.8063	866.641	0.222616	0.0013618	0.122622	0.00883727	0.940987	0.0470865	0.873532	8.8646	0.0112588	8.77276	0.01075	8.93379	0.0836971	52.5537	20.8621	0.591006	83.3071
MNI-5	541.188	0.792046	0.850134	0.668169	1.27233	89.1023	0.256111	0.00139966	0.830769	0.00917352	9.41688	0.0475559	9.20635	9.10574	0.0747557	9.01651	0.074854	9.27217	0.869174	76.1739	218.749	0.294626	88.1633
MNI-A	250.333	0.66157	0.381384	0.776083	0.491422	46.4289	0.214002	0.00139701	2.02362	0.0102177	18.1338	0.0530694	17.6221	9.09193	0.180678	8.99944	0.181987	10.3222	1.86233	330.755	399.699	0.305063	97.2791
MNI-B	377.212	0.561965	0.55938	2.11243	0.264803	34.3191	0.181827	0.00140034	1.50268	0.00942382	14.4693	0.0488298	14.0378	9.11586	0.134415	9.02088	0.13546	9.52398	1.37161	138.62	329.693	0.334757	93.4924
z1	426.179	0.277072	0.549864	2.83004	0.194295	31.263	0.0897704	0.00133409	1.91052	0.00641951	26.756	0.0349147	25.7276	8.6965	0.162387	8.59438	0.164088	6.49743	1.7329	-716.683	716.951	0.563653	101.199
z3	482.849	0.492648	0.71561	1.17045	0.611398	55.4658	0.159397	0.00142639	1.11557	0.00948586	11.4324	0.0482537	11.0607	9.28528	0.101658	9.18856	0.102432	9.58638	1.09079	110.671	261.122	0.376522	91.6974
z4	253.877	0.536152	0.384483	0.877256	0.438279	44.475	0.173431	0.00144351	2.05923	0.00912615	24.2176	0.0458735	23.5098	9.39436	0.189724	9.29873	0.191344	9.22451	2.22384	-10.1076	567.78	0.381212	191.998
z11	9657.07	0.577104	15.0674	0.863376	17.4517	1052.12	0.186622	0.0014701	0.136188	0.0094673	0.624044	0.0467275	0.558087	9.56451	0.0131844	9.4699	0.0128874	9.56771	0.0594263	34.2522	13.3878	0.561668	72.3525
z15	553.771	0.594681	0.849058	0.8312	1.02148	78.2937	0.192344	0.00143597	0.90342	0.0095787	9.0286	0.048401	8.77612	9.34438	0.0829385	9.25021	0.0835083	9.67976	0.869795	117.863	206.912	0.325533	92.1517
z16	366.897	0.817565	0.579987	0.551952	1.05079	76.2979	0.264347	0.0013979	0.962011	0.00946679	10.1171	0.049138	9.96612	9.09378	0.0865221	9.00518	0.0865704	9.56721	0.963379	153.377	233.429	0.203267	94.1287
z18	242.17	0.595484	0.358759	0.531206	0.675366	57.881	0.192665	0.00139326	1.55182	0.00824279	19.2574	0.0429273	18.792	9.06945	0.138641	8.9753	0.139184	8.33528	1.59859	-172.94	468.352	0.336564	105.19
z22	198.747	0.606927	0.28847	0.850559	0.339154	38.1084	0.19642	0.00135615	2.70041	0.00882968	28.6577	0.0472422	27.8012	8.83024	0.233814	8.73638	0.235758	8.92615	2.54682	60.423	662.525	0.359549	85.5413
z23	223.494	0.428512	0.302765	1.58857	0.190589	30.2323	0.138782	0.0013293	2.53893	0.0084064	26.365	0.0458859	25.5921	8.66187	0.215405	8.56354	0.217278	8.50004	2.23168	-9.45416	617.991	0.348135	190.58
z24	120.371	0.636187	0.214509	0.681714	0.314661	36.2267	0.205477	0.00163913	3.32298	0.013046	34.2218	0.0577505	33.1658	10.651	0.34931	10.5579	0.350549	13.161	4.47487	519.329	727.935	0.36142	97.967
z26	489.699	0.531162	0.713598	0.305832	2.3333	157.461	0.17189	0.00138965	0.546978	0.00896657	7.228	0.0468181	6.97166	9.04779	0.048653	8.95203	0.0489317	9.06393	0.652225	38.892	166.817	0.498034	76.9823
z29	169.366	0.525262	0.247035	0.417896	0.591139	53.4916	0.169977	0.00139431	1.68916	0.00880553	21.4219	0.0458237	20.9256	9.07792	0.150987	8.98201	0.151615	8.90185	1.89861	-12.7278	505.621	0.329853	170.57
z30	115.009	0.596053	0.161223	0.342228	0.471098	45.8882	0.192965	0.00132025	2.00991	0.00743985	26.6584	0.0408884	26.294	8.59941	0.170364	8.50527	0.170836	7.52633	1.99898	-295.695	671.47	0.217737	102.876
z31	1178.37	0.610145	1.8518	0.365079	5.07231	314.784	0.197292	0.00146762	0.195187	0.00949809	2.13685	0.0469586	2.10881	9.54773	0.0186585	9.45395	0.0184393	9.59869	0.204143	46.0569	50.3966	0.187131	79.4733
(b) McMullen Creek Ignimbrite (basal vitrophyre; Sample RC-10.1-005)
RC-10.1-005 (No Initial PbC correction)
	Composition					Isotopic Ratios								Dates (Ma)
														206Pb/
	mass	Th/	Pb*	Pbc	Pb*/	206Pb/	208Pb/	206Pb/		207Pb/		207Pb/		238U	±2σ	206Pb/	±2σ	207Pb/	±2σ	207Pb/	±2σ	Corr.
Fraction	U(pg)	U a	(pg) b	(pg) c	Pbc d	204Pb e	206Pb f	238U f	±2σ %	235U f	±2σ %	206Pb f	±2σ %	<Th> g	abs	238U h	abs	235U h	abs	206Pb h	abs	coef.	% disc i
Zircon
M03	1998.59	0.527238	2.92888	1.87691	1.56048	111.289	0.170607	0.00139732	0.602776	0.0092982	6.3597	0.0482832	6.26912	9.09701	0.0541573	9.0014	0.0542205	9.39761	0.594903	112.116	147.964	0.196461	91.9714
M9	1354.51	0.495397	2.06176	0.809993	2.54541	171.496	0.160236	0.00146462	0.391068	0.009629	4.28505	0.0477034	4.19844	9.53104	0.0368497	9.43463	0.0368688	9.73035	0.414959	83.5263	99.623	0.26454	88.7046
M10	193.884	0.612186	0.287438	0.563678	0.509933	47.8059	0.198076	0.00137894	1.88635	0.00972924	19.8849	0.0511947	19.5488	8.97656	0.167021	8.88311	0.167451	9.83116	1.94548	248.581	449.981	0.224116	96.4265
M31	430.625	0.728339	0.662966	0.662967	0.999998	74.8175	0.235553	0.00139419	1.01602	0.00908615	12.4016	0.0472878	12.1544	9.07177	0.0909671	8.98129	0.0911882	9.18426	1.13386	62.7257	289.525	0.281825	85.6817
M32	1346.83	0.617232	2.10833	1.71853	1.22682	89.6224	0.199589	0.00145713	0.779996	0.0097864	8.11509	0.0487323	8.00953	9.47974	0.0730891	9.38643	0.0731605	9.88863	0.798577	133.923	188.277	0.182438	92.9912
M42	242.483	0.68971	0.371771	0.403983	0.920264	70.9986	0.223063	0.00140715	1.03428	0.00830616	13.4094	0.0428305	13.2574	9.15616	0.0935511	9.06468	0.0936886	8.3991	1.12163	-178.57	330.778	0.184734	105.076
z2	4987.57	0.326013	6.80389	0.700338	9.71515	631.794	0.105572	0.00137589	0.108819	0.00896333	0.996151	0.0472693	0.972761	8.96417	0.00976268	8.86343	0.00963848	9.06067	0.0898565	61.7927	23.1885	0.262212	85.6562
z4	2205.58	0.668115	3.30983	1.80763	1.83103	123.558	0.216136	0.00138	0.531007	0.00900021	5.69717	0.0473225	5.6377	8.98191	0.0472124	8.88989	0.0471734	9.09778	0.516001	64.4702	134.251	0.15784	86.2109
z5	465.635	0.639207	0.710578	0.585197	1.21426	88.482	0.20675	0.00141231	0.829628	0.00948804	9.01712	0.0487459	8.8358	9.19068	0.0752629	9.09792	0.0754257	9.58858	0.860544	134.579	207.674	0.262296	93.2397
z6	1035.78	0.724192	1.67355	0.815277	2.05273	134.585	0.234098	0.00146392	0.466905	0.0097067	5.37522	0.0481112	5.3197	9.52074	0.0440881	9.43016	0.0439977	9.80849	0.52469	103.684	125.753	0.161528	90.9049
z7	2518.11	0.753246	4.01559	0.523004	7.67793	450.983	0.243518	0.00143553	0.188906	0.00928793	1.6569	0.0469461	1.55701	9.33723	0.0178251	9.24738	0.0174563	9.38728	0.154821	45.4203	37.2178	0.568147	79.6404
z9	251.226	0.74859	0.38881	0.599489	0.648568	54.572	0.242097	0.0013896	1.54077	0.0099002	16.8205	0.0516947	16.5581	9.04171	0.137573	8.95173	0.13783	10.0031	1.67431	270.907	379.608	0.214757	96.6956
z10	484.59	0.859874	0.768241	0.767458	1.00102	72.8199	0.278012	0.00138369	1.09767	0.0100452	11.9107	0.052676	11.6073	9.00082	0.097579	8.91368	0.0977749	10.1489	1.20278	313.853	264.068	0.318874	97.1599
z11	1265.75	0.586892	1.95006	1.32411	1.47274	104.642	0.18981	0.00144549	0.641693	0.00970944	6.65124	0.0487384	6.56657	9.40558	0.0596655	9.31149	0.0597081	9.81124	0.649426	134.219	154.35	0.179221	93.0624
z12	554.486	0.691191	0.89824	0.730224	1.23009	88.544	0.223423	0.00148123	0.791869	0.00963512	8.54784	0.0471984	8.43507	9.63298	0.0754555	9.54155	0.0755008	9.7365	0.828283	58.213	201.099	0.187709	83.6092
z14	742.858	0.812111	1.27377	1.59909	0.796563	62.28	0.262363	0.00151847	1.25414	0.0103118	12.8197	0.0492745	12.6564	9.86959	0.122485	9.78125	0.122577	10.4168	1.32858	159.869	296.086	0.178269	93.8817
z17	398.586	0.485257	0.569719	0.675733	0.843112	69.0325	0.157064	0.00137867	1.09623	0.00911474	11.7176	0.0479706	11.5537	8.97806	0.0970706	8.88138	0.0972937	9.21303	1.07467	96.7636	273.469	0.195256	90.8216
RC-10.1-005 (Correction for PbC Lab blank 0.3 ±0.1 (2σ) pg)
	Composition					Isotopic Ratios								Dates (Ma)
														206Pb/
	mass	Th/	Pb*	Pbc	Pb*/	206Pb/	208Pb/	206Pb/		207Pb/		207Pb/		238U	±2σ	206Pb/	±2σ	207Pb/	±2σ	207Pb/	±2σ	Corr.
Fraction	U(pg)	U a	(pg) b	(pg) c	Pbc d	204Pb e	206Pb f	238U f	±2σ %	235U f	±2σ %	206Pb f	±2σ %	<Th> g	abs	238U h	abs	235U h	abs	206Pb h	abs	coef.	% disc i
Zircon
M10	193.884	0.536671	0.279077	0.569265	0.490241	47.8059	0.173696	0.00136789	1.15469	0.00928146	13.6488	0.049233	13.2561	8.90736	0.100991	8.81199	0.101682	9.38077	1.27446	157.897	310.227	0.377476	94.4192
z17	398.586	0.432364	0.557804	0.683694	0.815869	69.0325	0.139974	0.00137102	0.580586	0.00880436	6.41482	0.0465959	6.2347	8.93011	0.0509543	8.83208	0.0512427	8.90067	0.568467	27.4959	149.504	0.351007	67.8786
z10	484.59	0.807938	0.753419	0.777363	0.969198	72.8199	0.261274	0.00137585	0.647237	0.00972761	8.47312	0.051301	8.10136	8.95169	0.0569733	8.86323	0.0573267	9.82951	0.828848	253.353	186.32	0.599878	96.5016
z2	4987.57	0.326013	6.80389	0.700338	9.71515	631.794	0.105572	0.00137589	0.108819	0.00896333	0.996151	0.0472693	0.972761	8.96417	0.00976268	8.86343	0.00963848	9.06067	0.0898565	61.7927	23.1885	0.262212	85.6562
z9	251.226	0.683864	0.379313	0.605835	0.6261	54.572	0.221221	0.00137992	0.903591	0.00950769	11.825	0.0499936	11.5371	8.98101	0.0798145	8.88939	0.0802684	9.60835	1.13083	193.658	268.233	0.352901	95.4098
z4	2205.58	0.668115	3.30983	1.80763	1.83103	123.558	0.216136	0.00138	0.531007	0.00900021	5.69717	0.0473225	5.6377	8.98191	0.0472124	8.88989	0.0471734	9.09778	0.516001	64.4702	134.251	0.15784	86.2109
M31	430.625	0.68272	0.651456	0.670657	0.97137	74.8175	0.220839	0.00138735	0.587691	0.00880863	8.81628	0.0460698	8.52632	9.02886	0.0521115	8.93721	0.0524867	8.90497	0.781654	0.195385	205.515	0.518512	-4474.15
M03	1998.59	0.483774	2.87888	1.91032	1.50701	111.289	0.15657	0.00139091	0.22132	0.00903841	2.25601	0.0471505	2.14396	9.05686	0.0198122	8.96014	0.0198168	9.13622	0.20519	55.7916	51.1427	0.54169	83.94
M42	242.483	0.666678	0.368474	0.406186	0.907155	70.9986	0.215633	0.00140366	0.819478	0.00816497	11.0772	0.0422069	10.8995	9.13432	0.0737376	9.04226	0.0740474	8.25691	0.910928	-215.295	273.923	0.252082	104.2
z5	465.635	0.606228	0.701535	0.591239	1.18655	88.482	0.196108	0.00140734	0.527915	0.00928637	6.10005	0.0478785	5.87923	9.15949	0.0475735	9.06589	0.0478266	9.38571	0.569896	92.2133	139.278	0.453827	90.1686
z7	2518.11	0.748622	4.00852	0.527729	7.59579	450.983	0.242028	0.00143481	0.162014	0.00925877	1.25654	0.0468222	1.12684	9.33271	0.0153815	9.24275	0.0149638	9.35795	0.117046	39.1	26.9726	0.821107	76.3613
z11	1265.75	0.544051	1.91759	1.3458	1.42486	104.642	0.175983	0.00143892	0.23488	0.00944304	2.2414	0.0476177	2.15222	9.36436	0.0217945	9.26919	0.0217558	9.54331	0.212902	79.2588	51.1141	0.423545	88.3052
M32	1346.83	0.562003	2.06335	1.74858	1.18001	89.6224	0.181768	0.00144857	0.276909	0.00943961	2.69195	0.0472831	2.57571	9.42607	0.02581	9.33135	0.0258207	9.53987	0.255606	62.4863	61.3624	0.461431	85.0666
z6	1035.78	0.698582	1.65721	0.826195	2.00583	134.585	0.225841	0.00145988	0.195827	0.0095429	2.99014	0.0474302	2.94772	9.49538	0.0186487	9.40414	0.0184024	9.64376	0.286997	69.8825	70.1263	0.246911	86.5429
M9	1354.51	0.475585	2.04559	0.820798	2.4922	171.496	0.15384	0.00146156	0.223529	0.00950503	2.58556	0.0471878	2.47819	9.51186	0.0210375	9.41494	0.0210297	9.60567	0.247189	57.6771	59.0928	0.512665	83.6765
z12	554.486	0.651521	0.884598	0.739339	1.19647	88.544	0.210631	0.00147493	0.395915	0.00937965	4.31515	0.0461433	4.19686	9.59342	0.0375514	9.50098	0.0375881	9.47955	0.407153	4.0385	101.088	0.340253	-135.26
z14	742.858	0.725518	1.23258	1.62661	0.757759	62.28	0.234462	0.00150426	0.431144	0.00973603	3.89108	0.0469625	3.70876	9.78036	0.0416478	9.68981	0.0417457	9.83798	0.380955	46.2527	88.622	0.468044	79.0503
RC-10.1-005 (Correction for PbC Lab blank 0.5 ±0.1 (2σ) pg)
	Composition					Isotopic Ratios								Dates (Ma)
														206Pb/
	mass	Th/	Pb*	Pbc	Pb*/	206Pb/	208Pb/	206Pb/		207Pb/		207Pb/		238U	±2σ	206Pb/	±2σ	207Pb/	±2σ	207Pb/	±2σ	Corr.
Fraction	U(pg)	U a	(pg) b	(pg) c	Pbc d	204Pb e	206Pb f	238U f	±2σ %	235U f	±2σ %	206Pb f	±2σ %	<Th> g	abs	238U h	abs	235U h	abs	206Pb h	abs	coef.	% disc i
Zircon
M03	1998.59	0.489308	2.88522	1.90608	1.51369	111.289	0.158357	0.00139172	0.251027	0.00907136	2.62137	0.0472947	2.51454	9.06195	0.0224623	8.96537	0.0224898	9.16938	0.239281	63.0721	59.8987	0.463982	85.7855
M9	1354.51	0.483364	2.05193	0.816561	2.5129	171.496	0.156351	0.00146276	0.290178	0.00955365	3.204	0.0473902	3.09766	9.51938	0.0272716	9.42266	0.0273225	9.65457	0.307867	67.8756	73.7207	0.405106	86.1177
M10	193.884	0.594056	0.285419	0.565028	0.505141	47.8059	0.192224	0.00137627	1.81436	0.0096211	18.7027	0.0507239	18.2471	8.95985	0.159794	8.86593	0.160749	9.72241	1.80968	227.27	421.644	0.29655	96.0989
M31	430.625	0.70791	0.657798	0.66642	0.987063	74.8175	0.228965	0.00139112	0.853647	0.00896155	10.7814	0.0467424	10.4807	9.0525	0.0759895	8.96149	0.0764464	9.05887	0.97233	35.0193	250.962	0.386889	74.4099
M32	1346.83	0.569828	2.06969	1.74434	1.18651	89.6224	0.184294	0.00144978	0.325796	0.00948851	3.29315	0.0474885	3.18076	9.43364	0.0303572	9.33912	0.0304044	9.58905	0.314296	72.8001	75.6282	0.388076	87.1716
M42	242.483	0.68971	0.371771	0.403983	0.920264	70.9986	0.223063	0.00140715	1.03428	0.00830616	13.4094	0.0428305	13.2574	9.15616	0.0935511	9.06468	0.0936886	8.3991	1.12163	-178.57	330.778	0.184734	105.076
z2	4987.57	0.326013	6.80389	0.700338	9.71515	631.794	0.105572	0.00137589	0.108819	0.00896333	0.996151	0.0472693	0.972761	8.96417	0.00976268	8.86343	0.00963848	9.06067	0.0898565	61.7927	23.1885	0.262212	85.6562
z4	2205.58	0.668115	3.30983	1.80763	1.83103	123.558	0.216136	0.00138	0.531007	0.00900021	5.69717	0.0473225	5.6377	8.98191	0.0472124	8.88989	0.0471734	9.09778	0.516001	64.4702	134.251	0.15784	86.2109
z5	465.635	0.629379	0.707877	0.587002	1.20592	88.482	0.203579	0.00141083	0.775756	0.00942779	8.24252	0.0484874	8.01055	9.18136	0.0700879	9.08836	0.0704538	9.52798	0.781672	122.069	188.715	0.341793	92.5547
z6	1035.78	0.708538	1.66355	0.821958	2.02389	134.585	0.229051	0.00146145	0.311381	0.00960648	3.87187	0.047695	3.81073	9.50523	0.029369	9.41424	0.0292927	9.7077	0.374079	83.1072	90.4308	0.234592	88.6722
z7	2518.11	0.75277	4.01486	0.523491	7.66939	450.983	0.243365	0.00143545	0.192506	0.00928492	1.64127	0.0469333	1.53133	9.33676	0.0181208	9.2469	0.0177881	9.38426	0.153311	44.7697	36.6087	0.608927	79.3456
z9	251.226	0.727185	0.385655	0.601597	0.641052	54.572	0.235195	0.00138639	1.40029	0.00976981	15.3055	0.0511322	14.9619	9.02154	0.124319	8.93102	0.124973	9.87196	1.50363	245.769	344.575	0.288299	96.3661
z10	484.59	0.830228	0.759761	0.773125	0.982713	72.8199	0.268458	0.00137921	0.848967	0.0098635	9.82813	0.0518912	9.46119	8.97271	0.0749647	8.88481	0.0753772	9.96616	0.974695	279.598	216.568	0.467273	96.8223
z11	1265.75	0.552447	1.92393	1.34157	1.43409	104.642	0.178693	0.0014402	0.303076	0.00949506	3.02559	0.0478374	2.93646	9.37241	0.0280736	9.27745	0.0280975	9.59564	0.288957	90.1775	69.5936	0.339264	89.712
z12	554.486	0.670003	0.89094	0.735102	1.212	88.544	0.216592	0.00147786	0.599723	0.00949841	6.34193	0.0466349	6.20056	9.61181	0.0568733	9.51984	0.0570505	9.59901	0.605894	29.5018	148.629	0.280244	67.7313
z14	742.858	0.738952	1.23892	1.62237	0.763647	62.28	0.238792	0.00150645	0.526983	0.00982467	5.11432	0.0473212	4.94128	9.79409	0.0509504	9.70389	0.0510994	9.92712	0.505231	64.4073	117.669	0.374129	84.9336
z17	398.586	0.460589	0.564146	0.679456	0.830291	69.0325	0.149095	0.00137509	0.891195	0.00896957	9.35799	0.0473296	9.14451	8.95564	0.0784407	8.85832	0.0788907	9.06695	0.844707	64.825	217.742	0.284364	86.335
RC-10.1-005 (Correction for PbC Lab blank 0.7 ±0.1 (2σ) pg)
	Composition					Isotopic Ratios								Dates (Ma)
														206Pb/
	mass	Th/	Pb*	Pbc	Pb*/	206Pb/	208Pb/	206Pb/		207Pb/		207Pb/		238U	±2σ	206Pb/	±2σ	207Pb/	±2σ	207Pb/	±2σ	Corr.
Fraction	U(pg)	U a	(pg) b	(pg) c	Pbc d	204Pb e	206Pb f	238U f	±2σ %	235U f	±2σ %	206Pb f	±2σ %	<Th> g	abs	238U h	abs	235U h	abs	206Pb h	abs	coef.	% disc i
Zircon
M03	1998.59	0.494836	2.89156	1.90185	1.5204	111.289	0.160143	0.00139253	0.305547	0.00910431	3.13223	0.0474388	3.01634	9.06704	0.0272814	8.97061	0.0273904	9.20253	0.286942	70.3121	71.7527	0.420494	87.2417
M9	1354.51	0.491131	2.05827	0.812323	2.53381	171.496	0.158859	0.00146396	0.387981	0.00960226	4.01114	0.0475924	3.88342	9.52691	0.0363767	9.43038	0.0365613	9.70346	0.387365	77.9946	92.2438	0.371975	87.9089
M10	193.884	0.612186	0.287438	0.563678	0.509933	47.8059	0.198076	0.00137894	1.88635	0.00972924	19.8849	0.0511947	19.5488	8.97656	0.167021	8.88311	0.167451	9.83116	1.94548	248.581	449.981	0.224116	96.4265
M31	430.625	0.728339	0.662966	0.662967	0.999998	74.8175	0.235553	0.00139419	1.01602	0.00908615	12.4016	0.0472878	12.1544	9.07177	0.0909671	8.98129	0.0911882	9.18426	1.13386	62.7257	289.525	0.281825	85.6817
M32	1346.83	0.57764	2.07603	1.74011	1.19305	89.6224	0.186815	0.00145099	0.410684	0.0095374	4.09186	0.0476935	3.96014	9.44121	0.0381912	9.34688	0.0383583	9.63823	0.392516	83.0328	93.9774	0.365441	88.7431
M42	242.483	0.68971	0.371771	0.403983	0.920264	70.9986	0.223063	0.00140715	1.03428	0.00830616	13.4094	0.0428305	13.2574	9.15616	0.0935511	9.06468	0.0936886	8.3991	1.12163	-178.57	330.778	0.184734	105.076
z2	4987.57	0.326013	6.80389	0.700338	9.71515	631.794	0.105572	0.00137589	0.108819	0.00896333	0.996151	0.0472693	0.972761	8.96417	0.00976268	8.86343	0.00963848	9.06067	0.0898565	61.7927	23.1885	0.262212	85.6562
z4	2205.58	0.668115	3.30983	1.80763	1.83103	123.558	0.216136	0.00138	0.531007	0.00900021	5.69717	0.0473225	5.6377	8.98191	0.0472124	8.88989	0.0471734	9.09778	0.516001	64.4702	134.251	0.15784	86.2109
z5	465.635	0.639207	0.710578	0.585197	1.21426	88.482	0.20675	0.00141231	0.829628	0.00948804	9.01712	0.0487459	8.8358	9.19068	0.0752629	9.09792	0.0754257	9.58858	0.860544	134.579	207.674	0.262296	93.2397
z6	1035.78	0.718474	1.66989	0.81772	2.04213	134.585	0.232254	0.00146302	0.458729	0.00967006	4.97861	0.0479591	4.87245	9.51507	0.043055	9.42434	0.0432006	9.77164	0.484158	96.1985	115.342	0.27479	90.2032
z7	2518.11	0.753246	4.01559	0.523004	7.67793	450.983	0.243518	0.00143553	0.188906	0.00928793	1.6569	0.0469461	1.55701	9.33723	0.0178251	9.24738	0.0174563	9.38728	0.154821	45.4203	37.2178	0.568147	79.6404
z9	251.226	0.74859	0.38881	0.599489	0.648568	54.572	0.242097	0.0013896	1.54077	0.0099002	16.8205	0.0516947	16.5581	9.04171	0.137573	8.95173	0.13783	10.0031	1.67431	270.907	379.608	0.214757	96.6956
z10	484.59	0.852414	0.766102	0.768888	0.996377	72.8199	0.275608	0.00138256	1.14092	0.00999939	11.6922	0.0524786	11.273	8.99373	0.100846	8.9064	0.101544	10.1028	1.17538	305.302	256.854	0.409592	97.0828
z11	1265.75	0.560829	1.93027	1.33733	1.44338	104.642	0.181399	0.00144148	0.407961	0.00954709	3.98454	0.0480567	3.86763	9.38046	0.037682	9.28571	0.0378548	9.64797	0.382607	101.005	91.4748	0.333258	90.8067
z12	554.486	0.688415	0.897282	0.730864	1.2277	88.544	0.222528	0.00148079	0.865339	0.00961717	8.6331	0.0471246	8.41175	9.6302	0.0819922	9.5387	0.0824811	9.71845	0.835001	54.4796	200.684	0.302562	82.4912
z14	742.858	0.752349	1.24526	1.61814	0.769566	62.28	0.243109	0.00150864	0.685425	0.00991332	6.6333	0.047679	6.42246	9.80783	0.0662171	9.71796	0.0665592	10.0163	0.661142	82.3121	152.428	0.354258	88.1938
z17	398.586	0.485257	0.569719	0.675733	0.843112	69.0325	0.157064	0.00137867	1.09623	0.00911474	11.7176	0.0479706	11.5537	8.97806	0.0970706	8.88138	0.0972937	9.21303	1.07467	96.7636	273.469	0.195256	90.8216

## Sheet: Table S6_Pb-Pb model
Table S6. Published Pb isotope data used to modal the isotopic composition for initial common Pb (PbC) used in 206Pb/238U zircon age interpretations (see supplementary text for method)
Sample*		208Pb/204Pb	207Pb/204Pb	206Pb/204Pb
GVP01KW^ 39.502 6 15.694 3 18.635 3		39.502	15.694	18.635
GVP08KW 39.751 4 15.710 3 18.759 1		39.751	15.71	18.759
GVP10KW^ 39.524 7 15.692 2 18.623 3		39.524	15.692	18.623
GVP15KW^ 39.327 9 15.687 3 18.530 1		39.327	15.687	18.53
GVP16LKW 39.438 7 15.714 3 18.587 4		39.438	15.714	18.587
GVP18KW 39.332 13 15.680 5 18.544 4		39.332	15.68	18.587
GVP21KW^ 39.353 4 15.687 2 18.539 2		39.353	15.687	18.539
Average		39.461	15.6949	18.6086
2SD		0.150853	0.0125755	0.0768979
*Sample ID and all data from Wright et al. (2002)

## Sheet: Table S7_Ages & Repose
	Table S7. Compilation of weighted mean 206Pb/238U age and repose period interpretations under different scenarios for PbC correction.
Sample	Age interpretation		No PbC correction					Corrected for Laboratory blank PbC 0.3±0.1 (pg)					Corrected for Laboratory blank PbC 0.5±0.2 (pg)					Corrected for Laboratory blank PbC 0.7±0.4 (pg)
			Date (Ma)	±2SD abs	n	MSWD		Date (Ma)	±2SD abs	n	MSWD		Date (Ma)	±2SD abs	n	MSWD		Date (Ma)	±2SD abs	n	MSWD
RC10.1-005	Weighted mean of youngest 5 dates, excluding the youngest high U date		8.988	0.037	5	0.2		8.956	0.027	5	0.89		8.977	0.033	5	0.23		8.987	0.037	5	0.19
	Weighted mean of youngest population, excluding the youngest high U date		9	0.034	6	0.75		8.971	0.024	6	2		8.989	0.031	6	0.84		8.999	0.034	6	0.75
	Youngest single data point		8.9642	0.0098				8.954	0.078				8.956	0.078				8.9642	0.009
	Weighted mean of youngest population that includes the youngest high U date		8.9669	0.0094	7	1.3		8.9651	0.009	7	1.7		8.9665	0.0093	7	1.1		8.9668	0.0094	7	1.3
RG001	Weighted mean of youngest 5 dates, excluding the youngest high U date		8.747	0.089	5	1.4		8.668	0.055	5	1.4		8.692	0.068	5	1.1		8.71	0.076	5	0.91
	Weighted mean of youngest population, excluding the youngest high U date		8.772	0.085	6	1.8		8.668	0.055	5	1.4		8.716	0.065	6	1.8		8.731	0.073	6	1.5
	Youngest single data point		8.6	0.17	1			8.57	0.13	1			8.6	0.17				8.6	0.17
	Weighted mean of youngest population that includes the youngest high U date		8.865	0.011	7	1		8.862	0.01	4	1.8		8.864	0.011	5	1.2		8.863	0.011	7	2.1
Rejection of younger dates
			Repose Duration	±2SD abs				Repose Duration	±2SD abs				Repose Duration	±2SD abs				Repose Duration	±2SD abs
Repose times	Repose between youngest 5 Weighted mean age interpretations		0.241	0.0963846				0.288	0.0612699				0.285	0.0755844				0.277	0.0845281
	Repose between youngest statistically acceptable weighted means excluding high-U		0.228	0.0915478				0.303	0.0600083				0.273	0.0720139				0.268	0.0805295
	Repose between Youngest single dates		0.3642	0.170282				0.384	0.151605				0.356	0.18704				0.3642	0.170238
	Repose between RG001 WM including high-U and 5 youngest WM		0.123	0.0386005				0.094	0.0287924				0.113	0.0347851				0.124	0.0386005
	Repose between RG001 WM including high-U and youngest WM exluding high-U RC10.1-005		0.135	0.0357351				0.109	0.026				0.125	0.0328938				0.136	0.0357351
	Repose between RG001 WM including high-U and youngest single data point		0.0992	0.0147323				0.092	0.0786384				0.092	0.0787718				0.1012	0.0142127
	Repose between RG001 WM including high-U and youngest WM		0.1019	0.0144693				0.1031	0.0134536				0.1025	0.0144045				0.1038	0.0144693
				= Preferred interpretations

## Sheet: Sheet1
Knott, T.R., et al., 2020, Discovery of two new super-eruptions from the Yellowstone hotspot track (USA): Is the Yellowstone hotspot waning?: Geology, v. 48, https://doi.org/10.1130/G47384.1
